# Supplementary material for: Open-air, green-solvent processed organic solar cells with efficiency approaching 18% and exceptional stability
Source: Royal Society of Chemistry journal article supplement (doi:10.1039/d4ee01944j), 2024-01-01
Supplement: d4ee01944j2.pdf [file d4ee01944j2.pdf]

## Electronic Supplementary Information

### Open-Air, Green-Solvent Processed Organic Solar Cells with Efficiency Approaching 18% and Exceptional Stability

*Thi Le Huyen Mai<sup>a,#</sup> Zhe Sun,<sup>a,#</sup> Seoyoung Kim,<sup>a</sup> Seonghun Jeong,<sup>a</sup> Seunglok Lee,<sup>a</sup> Jeewon Park,<sup>a</sup> and Changduk Yang<sup>a,b\*</sup>*

<sup>a</sup>School of Energy and Chemical Engineering, Perovtronics Research Center, Low Dimensional Carbon Materials Center, Ulsan National Institute of Science and Technology (UNIST), 50 UNIST-gil, Ulju-gun, Ulsan 44919, South Korea.

<sup>b</sup>Graduate School of Carbon Neutrality, Ulsan National Institute of Science and Technology (UNIST), 50 UNIST-gil, Ulju-gun, Ulsan 44919, South Korea.

\* Corresponding authors

Email: yang@unist.ac.kr (C. Y.)

## **Content**

- 1. Material and synthesis**
- 2. Instruments and Characterizations**
- 3. Device Fabrication and Characterization**
- 4. Conductivity and Electron Mobility Measurement**
- 5. Stability Measurement**
- 6. Figures and Tables**
- 7. Reference**

## 1. Materials and Synthesis

For the synthesis of cathode interface materials, all reagents and solvents were acquired from Sigma-Aldrich, Alfa Aesar, Combi-Blocks, and Ambeed, and they were employed without being purified. Dichloromethane (DCM), acetonitrile (ACN), dimethylformamide (DMF), methanol, toluene, triethylamine from Samchun chemical company, and Sigma-Aldrich. PM6, D18, D18-Cl, BTP-eC9, L8-BO and N3 were acquired from Derthon. PDIN, H75 and 1,7-Dibromoperylene-3,4,9,10-tetracarboxylic acid (PDIN-Br<sub>2</sub>) were synthesized as previously reported.<sup>1</sup>

*Synthesis of 4-bromo-3-fluoro-N,N-dimethylbenzamide (1):* To a suspension of 4-bromo-3-fluorobenzoic acid (5.0 g, 22.83 mmol) in DCM (50 mL) was added SOCl<sub>2</sub> (3.20 mL) and DMF (0.25 mL) at 10-15 °C. Then the reaction mixture was heated at 80 °C for 2 h. Then, the reaction mixture was concentrated, and the residue was diluted with anhydrous toluene (25 mL) and concentrated in turn for 3 times to remove most of SOCl<sub>2</sub>. Next, the residue was dissolved in anhydrous DCM (50 mL) at 0 °C and added dropwise dimethylamine (30 mL) and triethylamine (12 mL). After the completion of the addition, the reaction mixture was stirred over night at room temperature. The reaction mixture was extracted with DCM. The combined organic layer was washed with aqueous 1M HCl, aqueous NaOH, brine, and dried over anhydrous MgSO<sub>4</sub> and concentrated to give **1** as the yellow solid (4.78 g, 85% yield). <sup>1</sup>H NMR (400 MHz, CDCl<sub>3</sub>, δ): 7.69 (dd, *J* = 8.2 Hz, 1H), 7.28 (dd, *J* = 8.6 Hz, 1H), 7.17 (ddd, *J* = 8.2 Hz, 1H), 3.19 (d, 6H)

*Synthesis of 3-fluoro-N,N-dimethylbenzamide-4-boronic acid pinacol ester (2):* **1** (4.0 g, 16.25 mmol), [1,1'-Bis(diphenylphosphino)ferrocene]dichloropalladium(II), complex with DCM (0.66 g, 0.81 mmol), potassium acetate (4.78 g, 48.76 mmol), Bis(pinacolato)diboron (6.27 g, 24.69 mmol) were dissolved in 120 mL of 1,4- dioxane and then the mixture was stirred at 100 °C for 24 h under argon atmosphere. After cooling down to room temperature, the crude mixture was extracted with ethyl acetate, washed with water, brine. Next, solvents were evaporated under reduced pressure after the combined organic layer was dried with anhydrous MgSO<sub>4</sub>. Consequently, the residue was purified by column chromatography on silica gel (ethyl acetate : hexane = 4:1) to obtain **2** as the off-white solid (4.52 g, 95% yield). <sup>1</sup>H NMR (400 MHz, CDCl<sub>3</sub>, δ): 7.77 (dd, *J* = 7.6 Hz, 1H), 7.18 (dd, *J* = 7.5 Hz, 1H), 7.07 (dd, *J* = 9.2 Hz, 1H), 3.10 (s, 3H), 2.94 (s, 3H), 1.36 (s, 12H).

*Synthesis of 4-bromo-2,5-difluoro-N,N-dimethylbenzamide (3)*: Synthesized according to a similar procedure to compound **1** by utilizing 4-Bromo-2,5-difluorobenzoic acid (5.0 g, 21.09 mmol), SOCl<sub>2</sub> (2.71 mL), DMF (0.25 mL), DCM (50 mL), dimethylamine (30 mL) and triethylamine (12 mL), DCM (50 mL). (**3**) as yellow solid (5.27 g, 95% yield). <sup>1</sup>H NMR (400 MHz, CDCl<sub>3</sub>, δ): 7.34 (dd, *J* = 8.0 Hz, 1H), 7.16 (dd, *J* = 7.8 Hz, 1H), 3.12 (s, 3H), 2.94 (s, 3H).

*Synthesis of 2,5-difluoro-N,N-dimethylbenzamide-4-boronic acid pinacol ester (4)*: Synthesized according to a similar procedure to compound **2** by utilizing **3** (5.2 g, 19.69 mmol), [1,1'-Bis(diphenylphosphino)ferrocene]dichloropalladium(II), complex with DCM (0.60 g, 0.73 mmol), potassium acetate (5.79 g, 58.99 mmol), Bis(pinacolato)diboron (7.50 g, 29.53 mmol) and 1,4-dioxane (120 mL). (**4**) as off-white solid (5.80 g, 95% yield). <sup>1</sup>H NMR (400 MHz, CDCl<sub>3</sub>, δ): 7.42 (dd, *J* = 8.8 Hz, 1H), 7.04 (dd, *J* = 8.0 Hz, 1H), 3.11 (s, 3H), 2.91 (s, 3H), 1.35 (s, 12H).

*Synthesis of H75-2F*: PDIN-Br<sub>2</sub> (1.0 g, 1.39 mmol), **2** (1.22 g, 4.16 mmol), potassium carbonate (3.84 g, 27.80 mmol) and Pd(pph<sub>3</sub>)<sub>4</sub> (0.08 g, 0.06 mmol) was dissolved in 120 mL/60 mL/30 mL toluene/ethanol/water. Then, the mixture reaction was stirred at 100 °C for 24 h under the argon atmosphere. After cooling down to room temperature, the crude mixture was extracted with chloroform, washed with water, brine. Next, solvents were evaporated under reduced pressure after the combined organic layer was dried with anhydrous MgSO<sub>4</sub>. The residue was purified by column chromatography on silica gel (chloroform : triethylamine : methanol =4.0:0.2:0.2) to obtain **H75-2F** as the red solid (0.99 g, 80%). <sup>1</sup>H NMR (400 MHz, CDCl<sub>3</sub>, δ): 8.68 (m, 4H), 8.55 (s, 0.5H), 8.25 (dd, *J* = 8.0 Hz, 1H), 7.98 (m, 2H), 7.77 (t, 0.5H), 7.66 (t, 0.5H), 7.58 (t, 0.5H), 7.51 (m, 1H), 7.41 (m, 0.5H), 7.36 (m, 0.5H), 7.30 (m, 0.5H), 7.23 (m, 0.5H), 4.23 (m, 4H), 3.18 (d, 12H), 2.44 (m, 4H), 2.27 (s, 12H), 1.9 (m, 4H). <sup>13</sup>C NMR (151 MHz, CDCl<sub>3</sub>, δ): 169.24, 163.13, 139.07, 135.95, 135.41, 135.06, 134.73, 134.23, 133.99, 133.57, 133.35, 133.19, 132.89, 131.29, 130.90, 130.42, 130.15, 128.91, 128.66, 128.53, 128.03, 127.06, 125.12, 124.80, 123.69, 123.33, 123.06, 122.73, 122.55, 116.09, 62.69, 57.20, 45.38, 39.68, 39.00, 35.57, 29.70, 26.08. HRMS (MALDI-TOF): calcd for C<sub>52</sub>H<sub>48</sub>F<sub>2</sub>N<sub>6</sub>O<sub>6</sub>, 890.99. Found: 891.37.

*Synthesis of H75-4F*: Synthesized according to a similar procedure to H75-1F by utilizing PDIN Br<sub>2</sub> (1.0 g, 1.39 mmol), **4** (1.30 g, 4.18 mmol), potassium carbonate (3.84 g, 27.80 mmol) and Pd(pph<sub>3</sub>)<sub>4</sub> (0.08 g, 0.06 mmol) and toluene/ethanol/water (120 mL/60 mL/30 mL). **H75-4F** as

dark red solid (0.96 g, 75% yield).  $^1\text{H}$  NMR (400 MHz,  $\text{CDCl}_3$ ,  $\delta$ ): 8.69 (m, 3H), 8.59 (d,  $J = 5.9$  Hz, 0.5H), 8.53 (s, 0.5H), 8.33 (dd,  $J = 8.1$  Hz, 2H), 8.00 (dd,  $J = 8.3$ , 2H), 7.49 (m, 0.5H), 7.38 (m, 0.5H), 7.31 (m, 0.5H), 7.20 (m, 0.5H), 4.26 (m, 4H), 3.20 (s, 6H), 3.08 (s, 6H), 2.46 (m, 4H), 2.27 (s, 11H), 1.93 (m, 4H).  $^{13}\text{C}$  NMR (151 MHz,  $\text{CDCl}_3$ ,  $\delta$ ): 169.24, 163.13, 139.07, 135.95, 135.41, 135.06, 134.73, 134.23, 133.99, 133.57, 133.35, 133.19, 132.89, 131.29, 130.90, 130.42, 130.15, 128.91, 128.66, 128.53, 128.03, 127.06, 125.12, 124.80, 123.69, 123.33, 123.06, 122.73, 122.55, 116.09, 62.69, 57.20, 45.38, 42.50, 39.68, 39.00, 36.71, 35.57, 31.93, 29.70, 26.08, 25.73, 22.70. HRMS (MALDI-TOF): calcd for  $\text{C}_{52}\text{H}_{46}\text{F}_4\text{N}_6\text{O}_6$ , 926.97. Found: 927.34.

## 2. Instruments and Characterizations

$^1\text{H}$  NMR spectra were determined on a 400 MHz FT-NMR (Bruker) (AVANCE III HD) spectrometer using deuterated chloroform solution ( $\text{CDCl}_3$ ) as solvent at 298 K.  $^{13}\text{C}$  NMR spectra were investigated on a 600 MHz FT-NMR (Bruker) (AVANCE NEO) spectrophotometer using  $\text{CDCl}_3$ . A Shimadzu UV-2550 spectrometer was used to obtain UV-vis spectra. An AMETEK Versa STAT 3 equipped with a three-electrode cell system was used to measure cyclic voltammetry (CV) at room temperature using a nitrogen-bubbled 0.1 M tetra-n-butylammonium hexafluorophosphate ( $\text{n-Bu}_4\text{NPF}_6$ ) in acetonitrile ( $\text{CH}_3\text{CN}$ ) solution at a scan rate of  $100 \text{ mV}^{-1} \text{ s}^{-1}$ . As the reference electrode, counter electrode, and working electrode, respectively,  $\text{Ag}/\text{Ag}^+$ , platinum wire, and glassy carbon electrode were used. An autoflex max instrument (Bruker) was used to measure the results of the MALDI-TOF mass spectrometry experiments. Thermogravimetric Analysis (TGA) were measured using Q500 (TA instruments, USA) with a scan rate of  $10 \text{ }^\circ\text{C}$  per minute in nitrogen flow.

Employing ultraviolet photoelectron spectra (UPS) and high-resolution XPS scans, the ESCALAB 250XI analyzer from Thermo Fisher Scientific was employed to determine the films' work function and atom concentration distribution. EMXplus (Bucker) (300 K, 9.3~9.9 GHz, X-band, microwave maximum source output 200 mW) was used to record Electron Spin Resonance Spectrometer (ESR) spectra. The results of TOF-SIMS 5 (ION TOF) were obtained using time of flight secondary ion mass spectrometry (TOF-SIMS).

Multimode V microscope (Veeco, USA) was used to carry out the microscopy surface of the thin films with a Nanoscope controller using Si tips (Bruker) for atomic force microscopy (AFM) images and Pt:Ti-coated tips (SPARK 70 Pt, Nu Nano Ltd) for surface potential measurements (KPFM). GIWAXS was conducted at the Pohang Accelerator Laboratory in Korea at the PLS-II 6D U-SAXS and 9A beamline. A Rayonix SX165 two-dimensional CCD detector was used to record the scattering signal. The energy of the X-ray light was 11.24 KeV. The X-ray incidence angle was set between 0.08 and 0.12 in order to optimize the signal-to-background ratio.

The contact angles were measured using a goniometer (DSA100, KRÜSS, Germany) at ambient temperature. For the contact angle measurements of water on CIM film surfaces, 6  $\mu$ L water was dropped onto each of H75, H75-2F, and H75-4F neat films. For the contact angle measurements of CIM solutions on the active layer, 6  $\mu$ L droplets of H75, H75-2F, H75-4F and PDIN were dropped onto the surface of active layer. The average values were obtained from at least three measurements.

### **3. Device Fabrication and Characterization**

The organic solar cell devices were fabricated with conventional architecture ITO/PEDOT : PSS/active layer/cathode interface material (CIM)/Ag. The ITO glasses were sequentially washed with detergent, deionized water, acetone, and isopropyl alcohol under sonication system and then dried overnight in an oven. After being treated by UV-Ozone for 20 min, PEDOT:PSS (Bayer Baytron 4083) was spin-coated at 4000 rpm onto ITO glasses ( $\sim$  30 nm), followed by annealing at 150 °C for 20 min in air. Next, the blend solution of PM6 : BTP-eC9 (1.0 : 1.2) in o-xylene at 21 mg/mL was spin-coated at 2200 rpm onto the PEDOT: PSS layer, and then the active layers were annealed at 80 °C for 10 min. In the case of D18/L8-BO, D18 was dissolved in chlorobenzene at a concentration of 4 mg/ml and spin-coated at 1600 rpm. Subsequently, L8-BO dissolved in chloroform at 10mg/mL was spin-coated at 3000rpm. And annealing at 100 °C for 2 min. In the case of D18-Cl : N3 system, the blend solution of D18-Cl:N3 (1.0 : 1.4) in CF at 10 mg/mL was spin-coated at 2200 rpm before annealing at 80 °C for 10 min. DIB at 60% mass fraction as additive. In case of PM6:Y6 system, the blend solution of PM6:Y6 (1.0 : 1.2) in CF at 15.5mg/mL was spin-coated at 2700 rpm before annealing at 80 °C for 5 min. CN at 0.5% volume fraction as additive.

After that, the ethanol solution of H75 (2.0 mg/mL), H75-1F (2.0 mg/mL), H75-2F (0.5 mg/mL) or PDIN (2.0 mg/mL, 1.5% acid acetic) was spin-coated onto the active layer with 3000 rpm for 30s. Finally, Ag cathode (~ 100nm) was thermally evaporated on top of the substrates under high vacuum ( $<3.0 \times 10^{-6}$  Pa).

Relevant to the fabrication of air-processed OSCs, all processes from making the blend solution of PM6:BTP-eC9 active layer, annealing and spin-coating the cathode interface layer were conducted in ambient environment in high humidity conditions (RH of 60%–80%). The temperature was controlled at  $25 \pm 3^\circ\text{C}$ .

Under the light of an AM 1.5G solar simulator, current density–voltage ( $J$ – $V$ ) measurements were made using a Keithley 2400 source–measure unit at an intensity of  $100 \text{ mW cm}^{-2}$ . A standard Si solar cell was used to calibrate the light intensity of the solar simulator. The external quantum efficiency (EQE) measurements were conducted using Model QE-R3011 (Enli Technology) in ambient air. SCLC method was used to measure the electron mobilities through ITO/ZnO/CIM/Al. And the SCLC mobilities were calculated using the Mott–Gurney equation,  $J_{\text{SCLC}} = (9/8)\epsilon_0\epsilon_r\mu((V^2)/(L^3))$ , where  $\epsilon_r$  is the relative dielectric constant of the organic semiconductor,  $\epsilon_0$  is the permittivity of empty space,  $\mu$  is the mobility of zero-field,  $L$  is the thickness of the active layer, and  $V$  is applied voltage across the device. The electrochemical impedance spectroscopy (EIS) measurement was performed using a E4990A Impedance Analyzer with a 20 mV ac signal at frequencies from 5 MHz to 20 Hz under the dark. A bias voltage equal to  $V_{\text{oc}}$  was applied to offset the total current. Using the analyzer function of an organic semiconductor parameter test system (McScience T4000), transient photovoltage (TPV) transient photocurrent (TPC) measurements were carried out in the presence of a white light-emitting diode.

#### **4. Conductivity and Electron Mobility Measurement**

CIMs in chloroform were spin-coated at a film thickness ( $d$ ) of  $\sim 100$  nm on substrates with parallel silver electrodes and the conductivities of the CIMs were measured by the slope of the  $I$ – $V$  plot using the equation  $I = \sigma \times A \times V \times d^{-1}$ , where  $d$  is the film thickness and  $A$  is the sample area. To assess charge transport and extraction efficiency, electron mobility of H75 derivatives was

quantified using the space-charge-limited current (SCLC) method in electron-only devices (ITO/ZnO/CIM/Al).

## 5. Stability Measurement

The PM6:BTP-eC9 system was employed to conduct long-term thermal, light-soaking, and air stability testing on unencapsulated devices. Cells were placed on petri plates and stored in a nitrogen-filled glovebox for long-term stability testing. To test thermal stability, cells were placed on a hot plate at 85 °C in a glovebox filled with nitrogen and covered with aluminum foil to block room light. The PCE was occasionally recorded after cooling at ambient temperature. To assess light-soaking stability, the cells were exposed to 100 mW cm<sup>-2</sup> continuous illumination in a nitrogen-filled glovebox utilizing ORIEL LED Solar Simulator (LSH7320 ABA). Using room light, the cells were tested for air stability at 25 °C and 40%–60% RH.

## 6. Figures and Tables

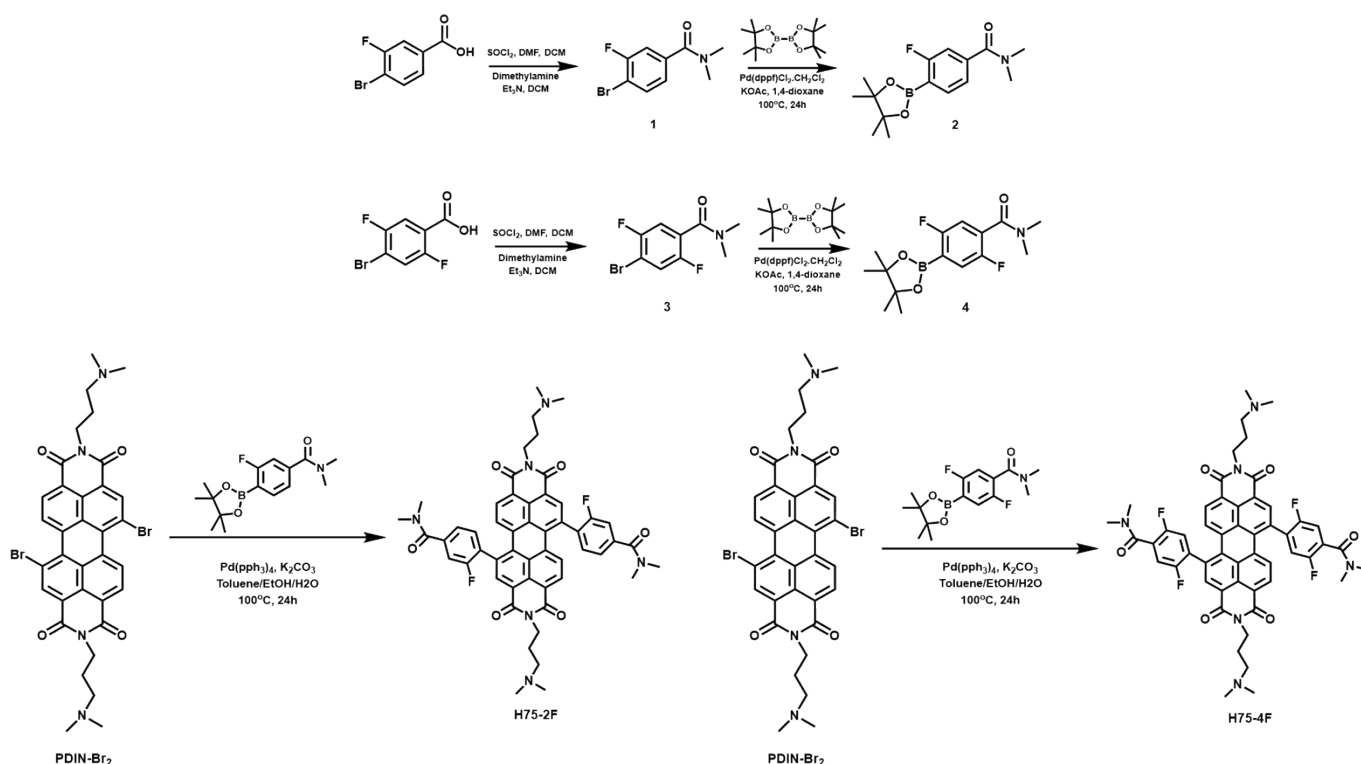

**Fig. S1** The synthetic route of H75-2F and H75-4F.



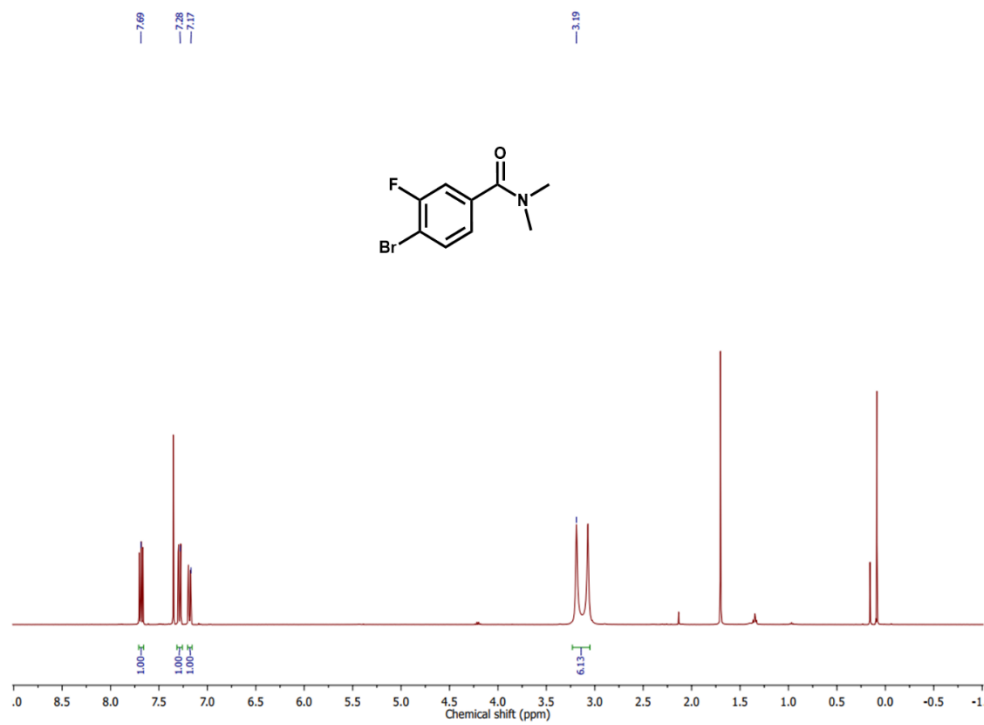

Fig. S2 <sup>1</sup>H NMR spectrum of 4-bromo-3-fluoro-N,N-dimethylbenzamide.

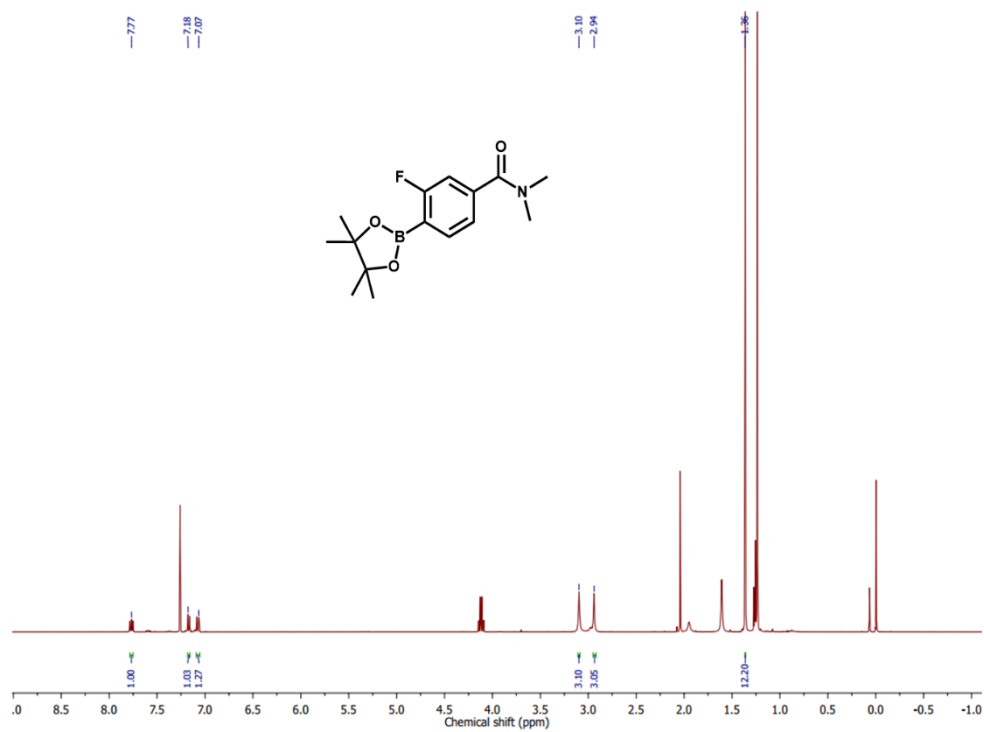

Fig. S3  $^1\text{H}$  NMR spectrum of 3-fluoro-*N,N*-dimethylbenzamide-4-boronic acid pinacol ester.

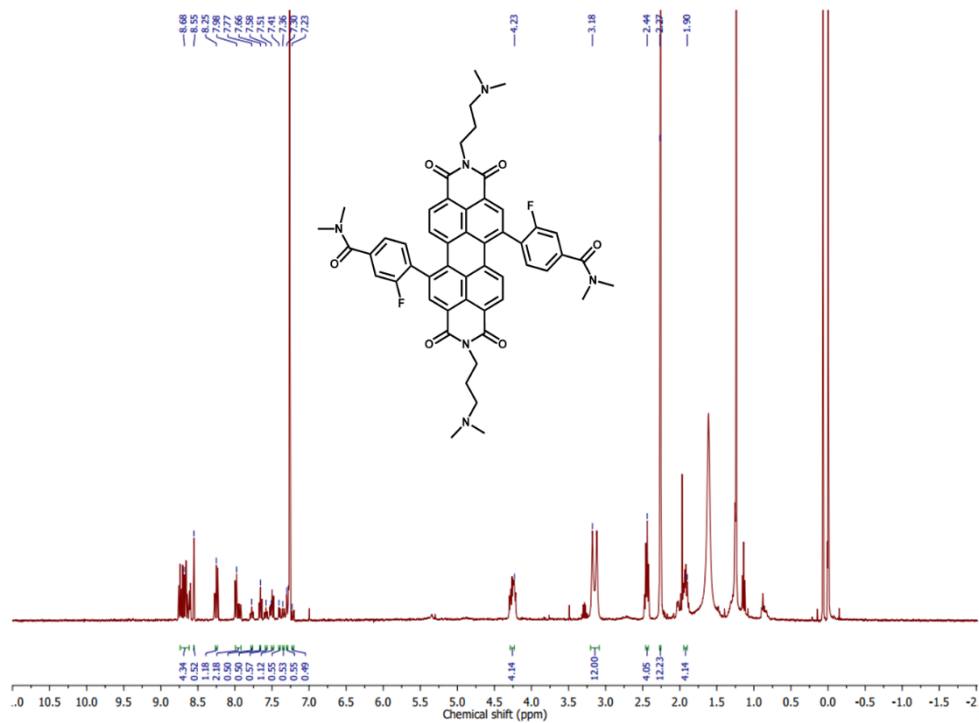

Fig. S4  $^1\text{H}$  NMR spectrum of H75-2F.

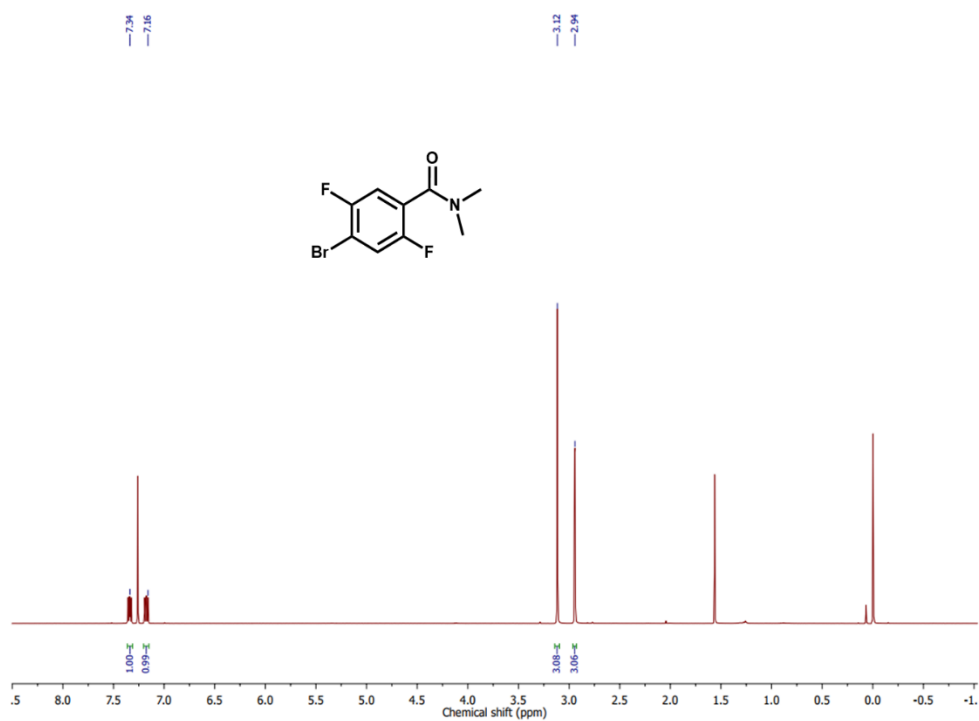

Fig. S5  $^1\text{H}$  NMR spectrum of 4-bromo-2,5-difluoro-*N,N*-dimethylbenzamide.

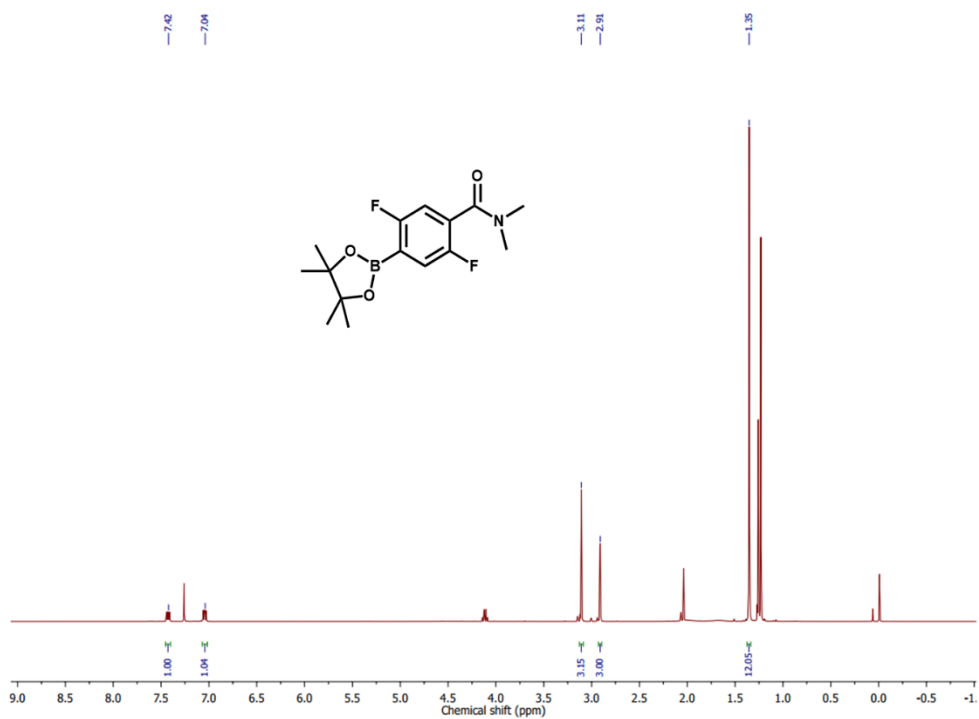

Fig. S6  $^1\text{H}$  NMR spectrum of 2,5-difluoro-*N,N*-dimethylbenzamide-4-boronic acid pinacol ester.

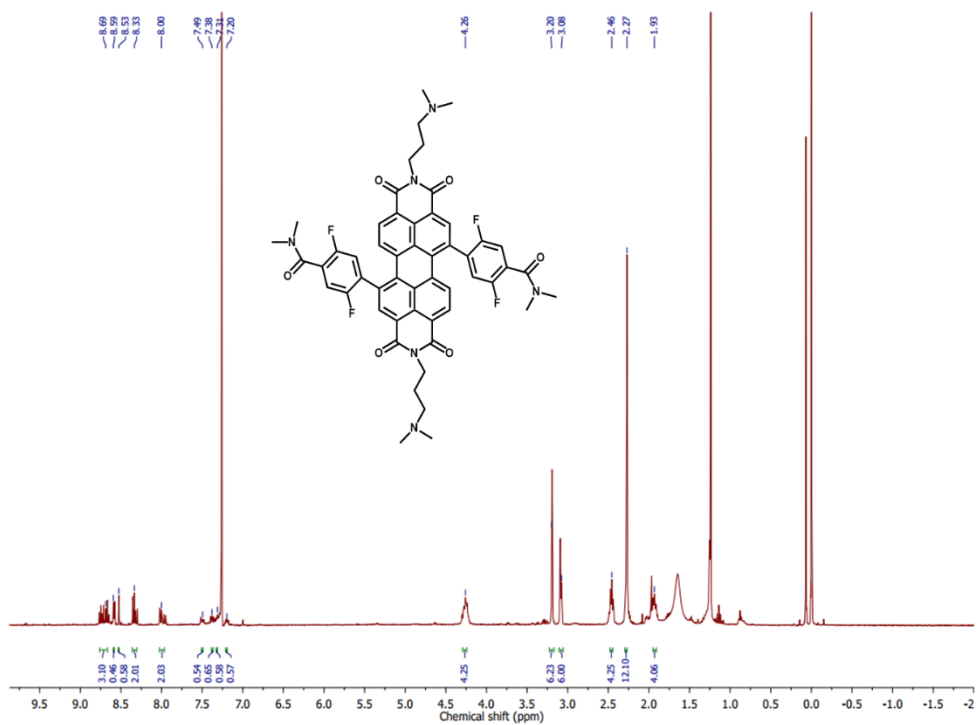

Fig. S7  $^1\text{H}$  NMR spectrum of H75-4F.

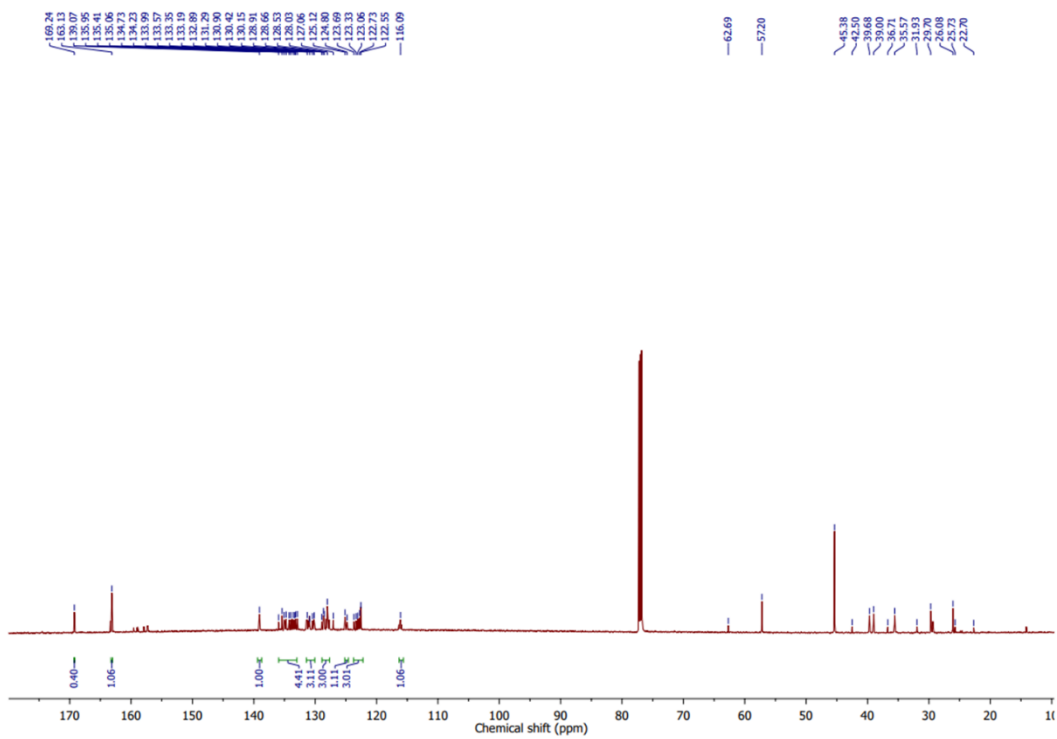

Fig. S8 The integrated  $^{13}\text{C}$  NMR spectrum of H75-2F.

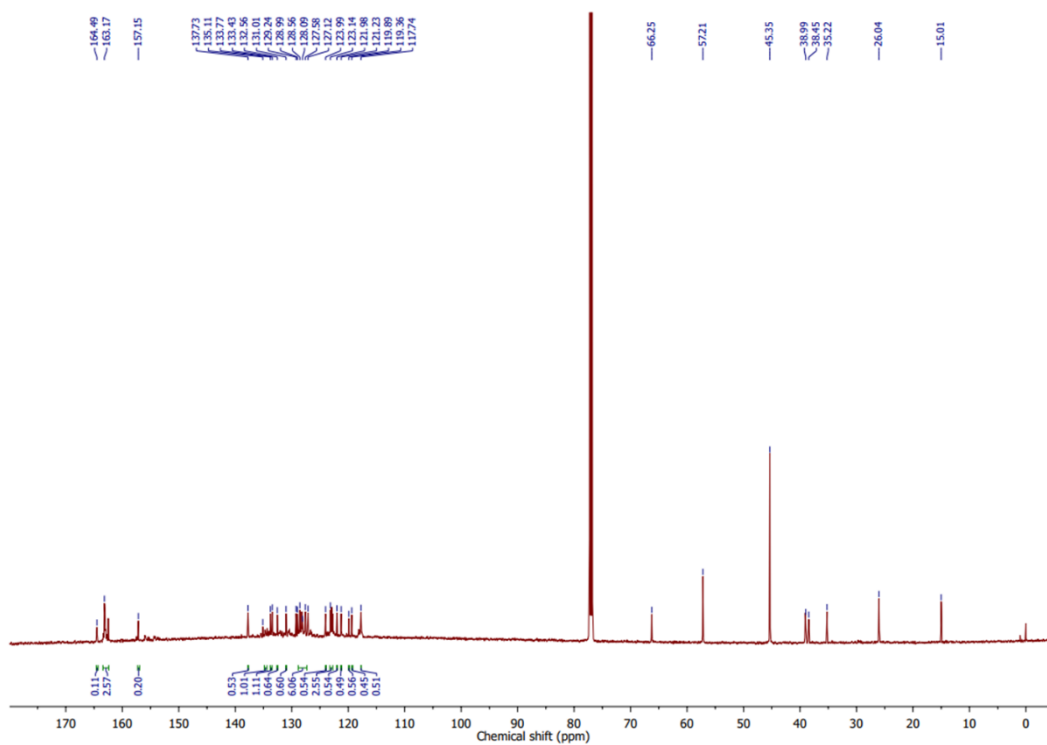

**Fig. S9** The integrated  $^{13}\text{C}$  NMR spectrum of H75-4F.

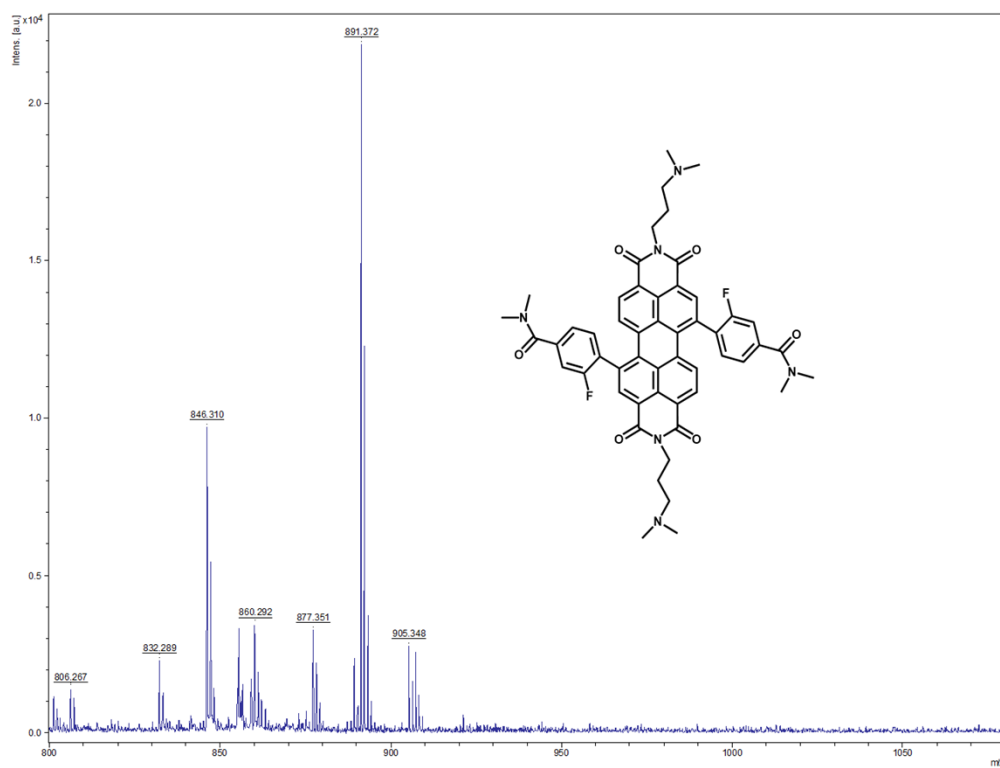

**Fig. S10** MALDI-TOF mass spectrometry of H75-2F.

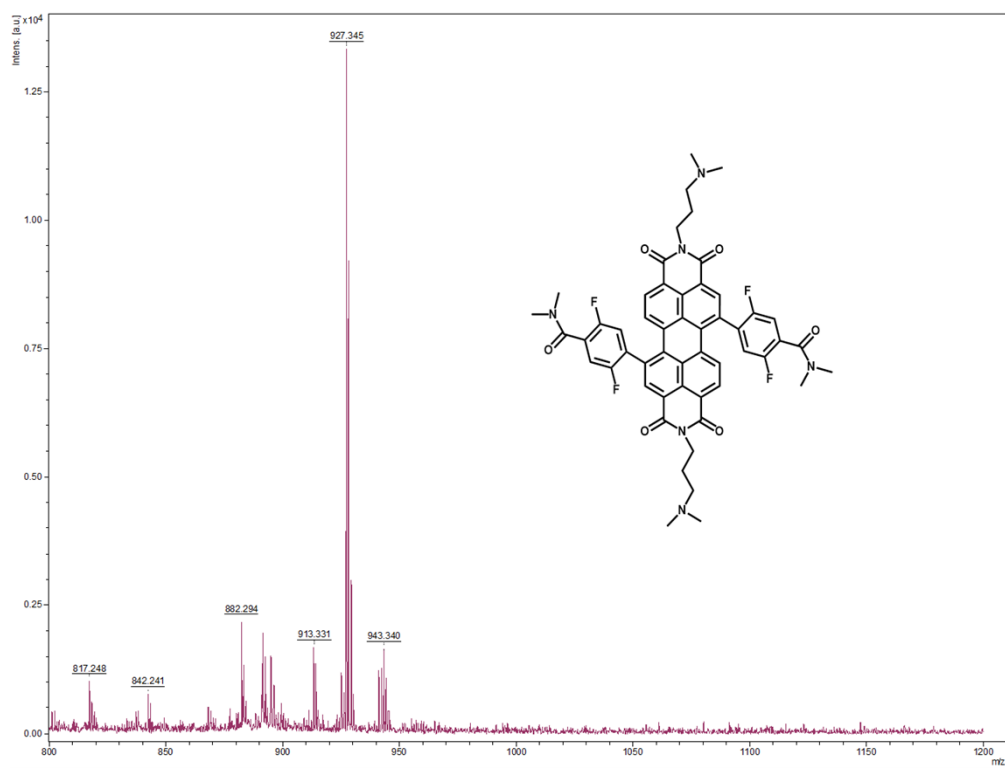

**Fig. S11** MALDI-TOF mass spectrometry of H75-4F.

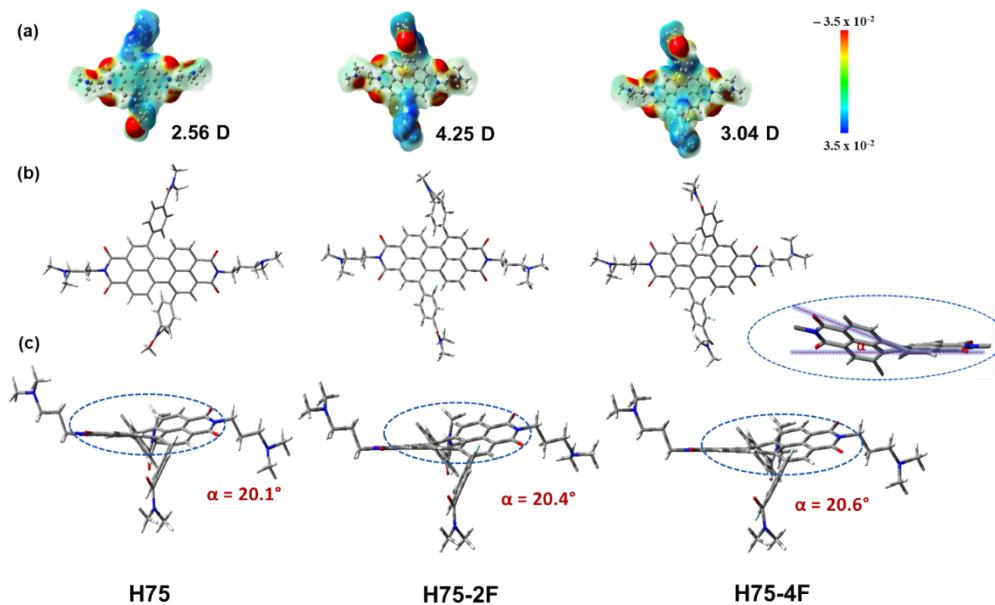

**Fig. S12** Geometries are optimized by B3LYP/6-31G levels. (a) Electrostatic potential (ESP) distribution and dipole moment, (b) In front of view and (c) Side view of H75, H75-2F, and H75-4F.

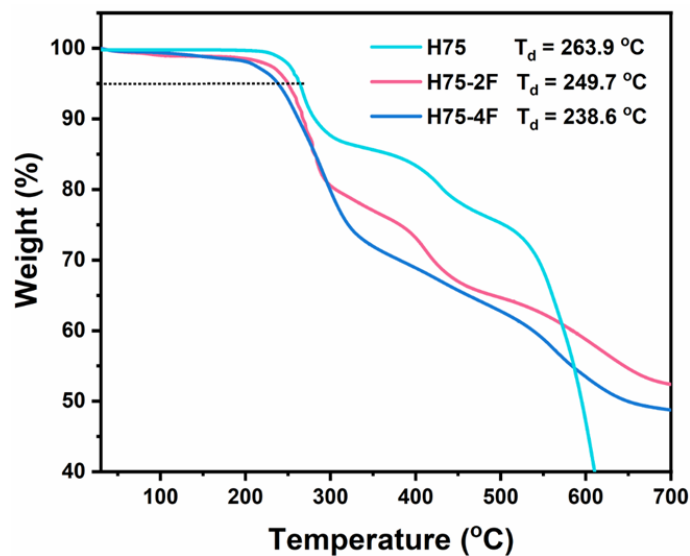

**Fig. S13** TGA plots of H75, H75-2F, and H75-4F.

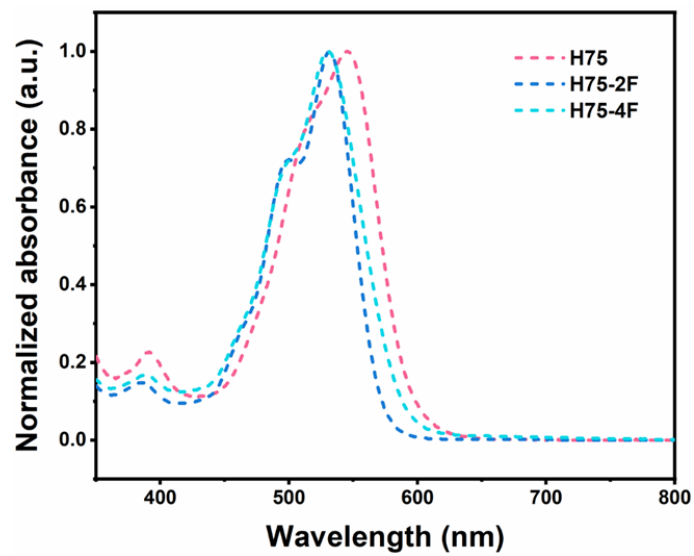

**Fig. S14** Normalized UV-vis absorption spectra of H75, H75-2F, and H75-4F in ethanol solution.

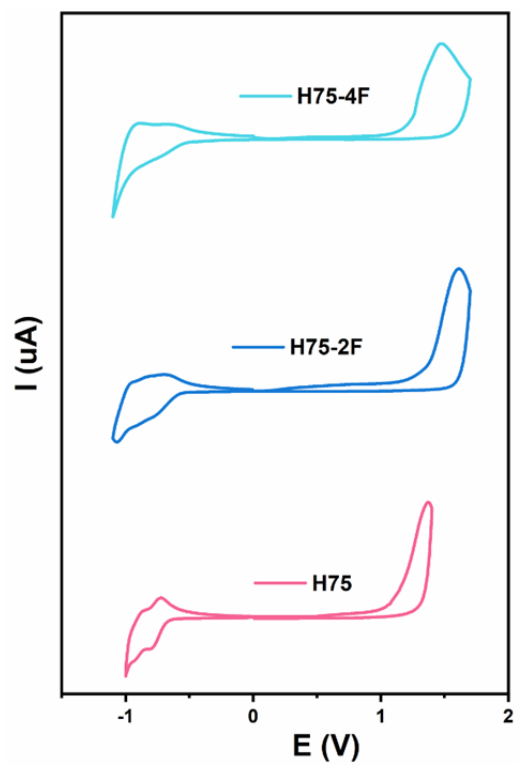

**Fig. S15** Cyclic voltammograms of H75, H75-2F, and H75-4F films in acetonitrile solution.

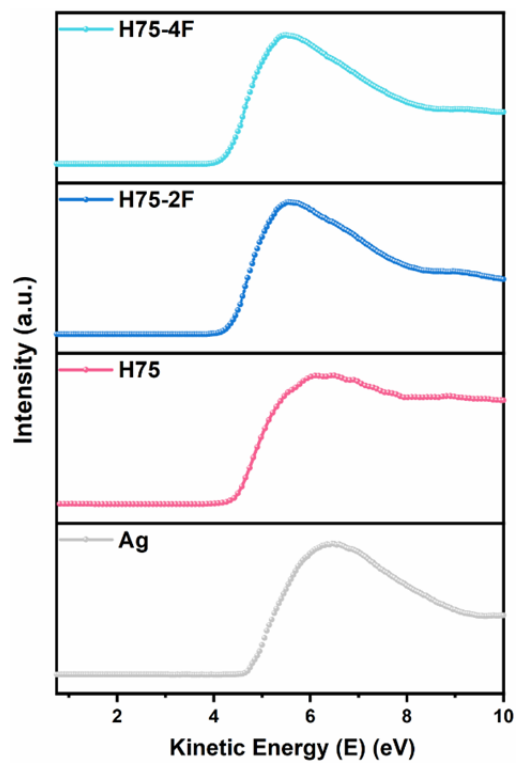

**Fig. S16** UPS spectra of the Ag electrodes covered with H75, H75-2F, and H75-4F-based CIMs.

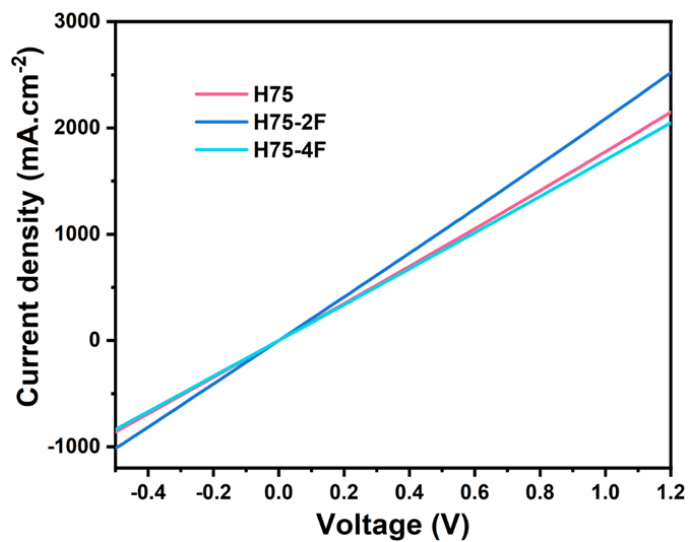

**Fig. S17** The  $J$ - $V$  curve of devices with configuration of ITO/CIM/Ag.



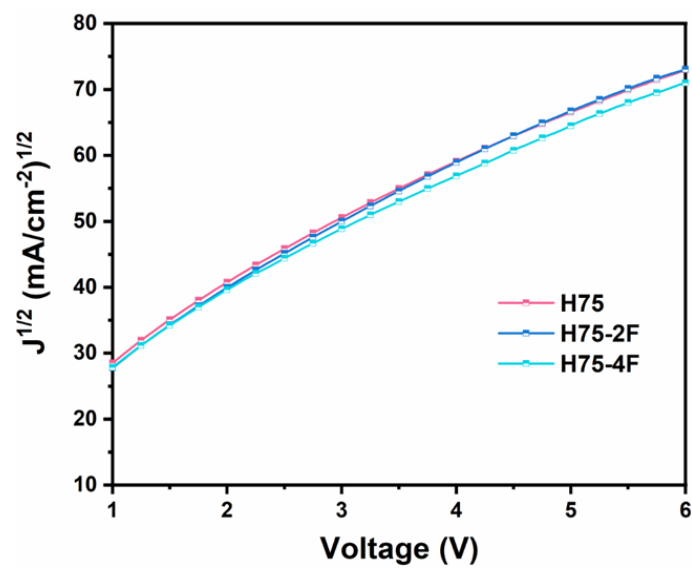

**Fig. S18** SCLC plots of electron only devices with the configuration of ITO/ZnO/CIM/Al.

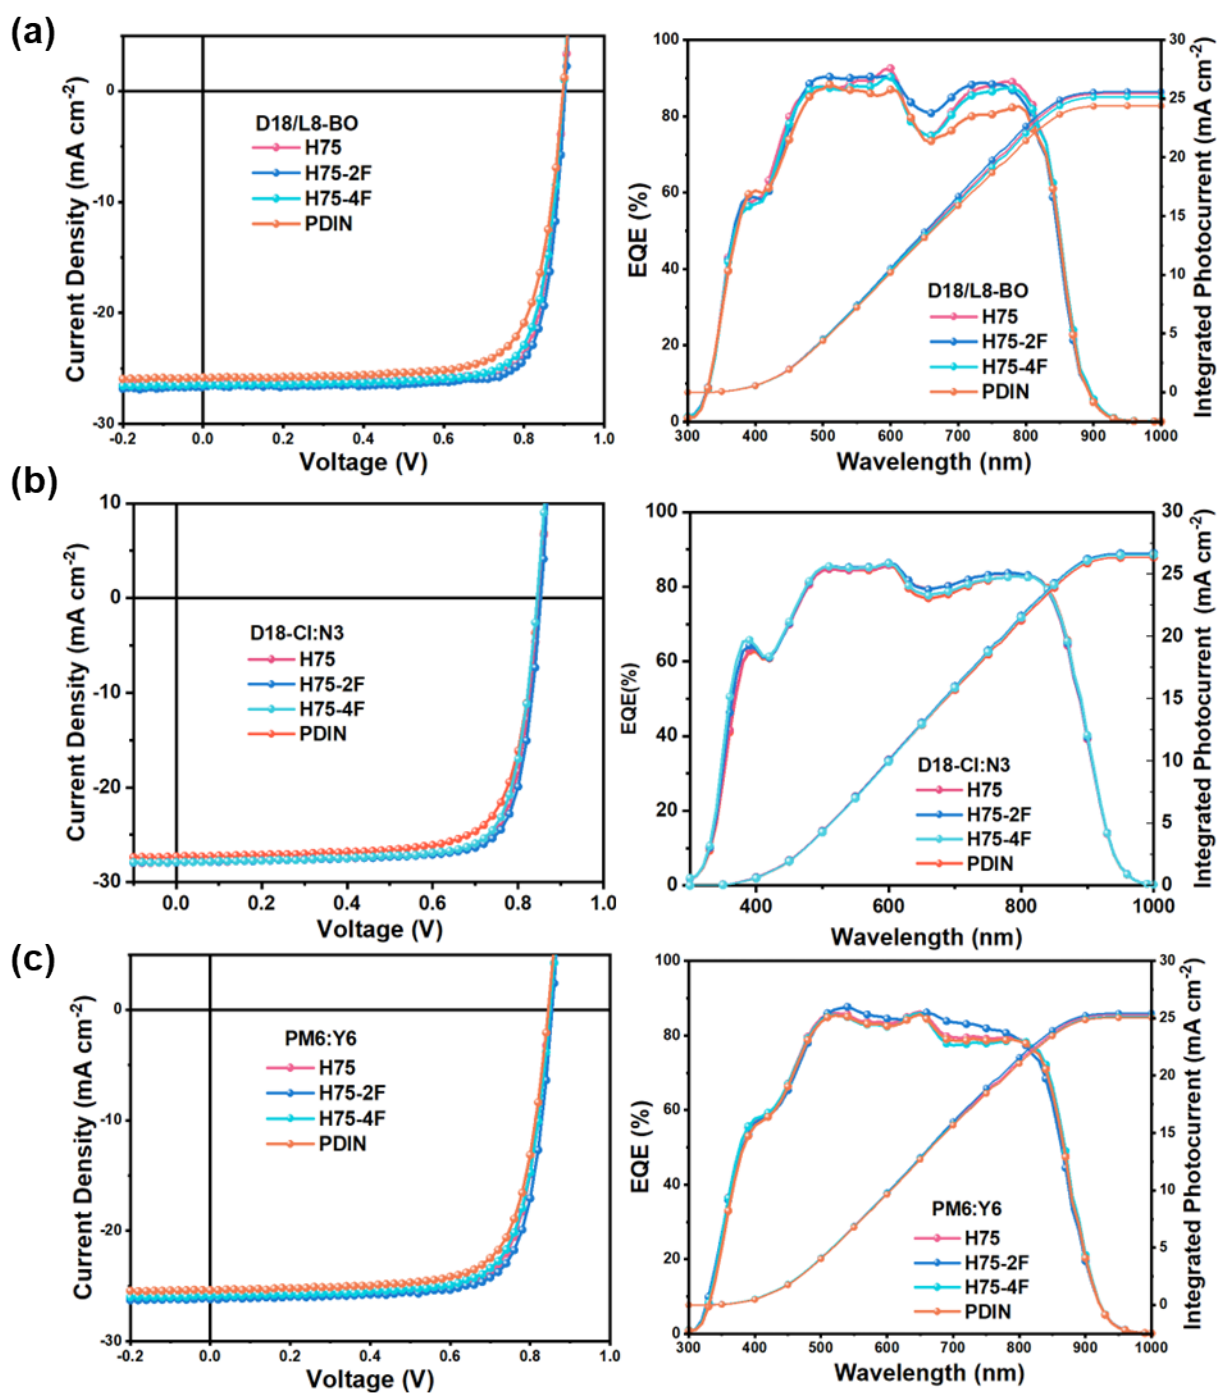

**Fig. S19** The  $J$ - $V$  curves and EQE spectra of the devices based on a) D18/L8-BO, b) D18-Cl:N3, c) PM6:Y6 system with H75, H75-2F, H75-4F, and PDIN CIMs.

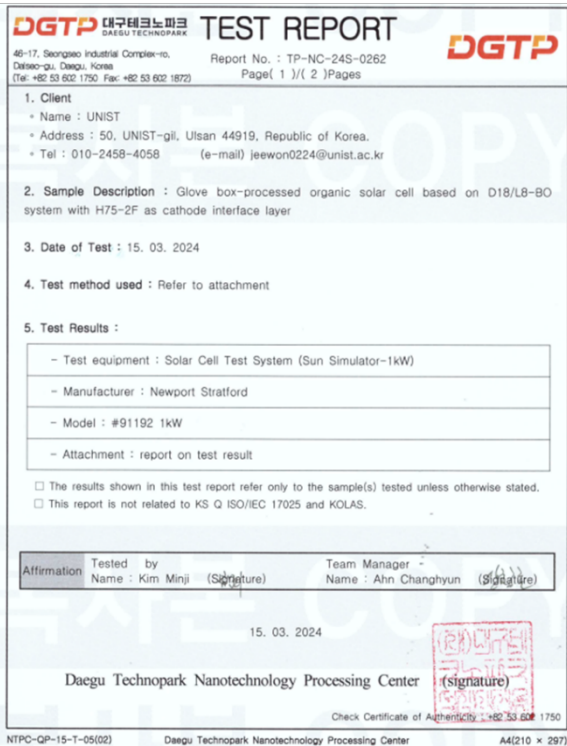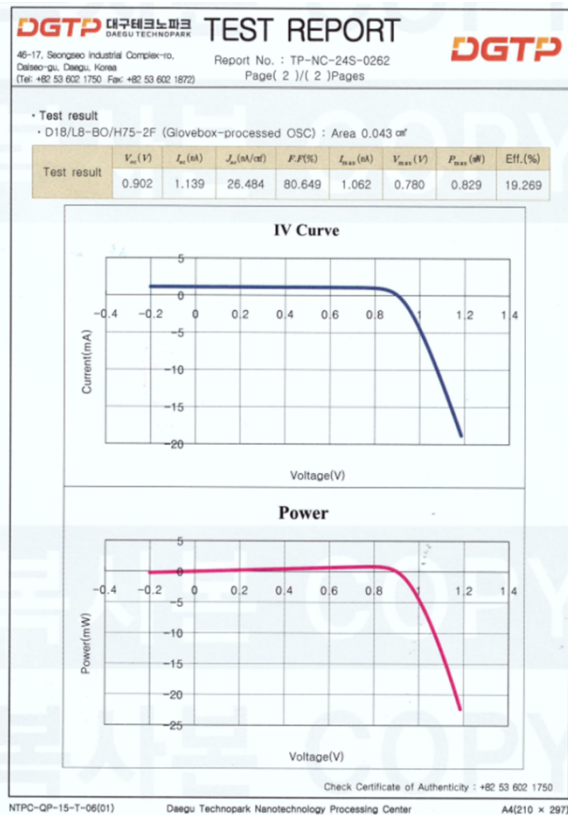

**Fig. S20** Certificate of glovebox-processed organic solar cell based on D18/L8-BO system with H75-2F as cathode interface layer from Daegu Technopark Nanotechnology Processing Center (DGTP), Daegu, Korea.

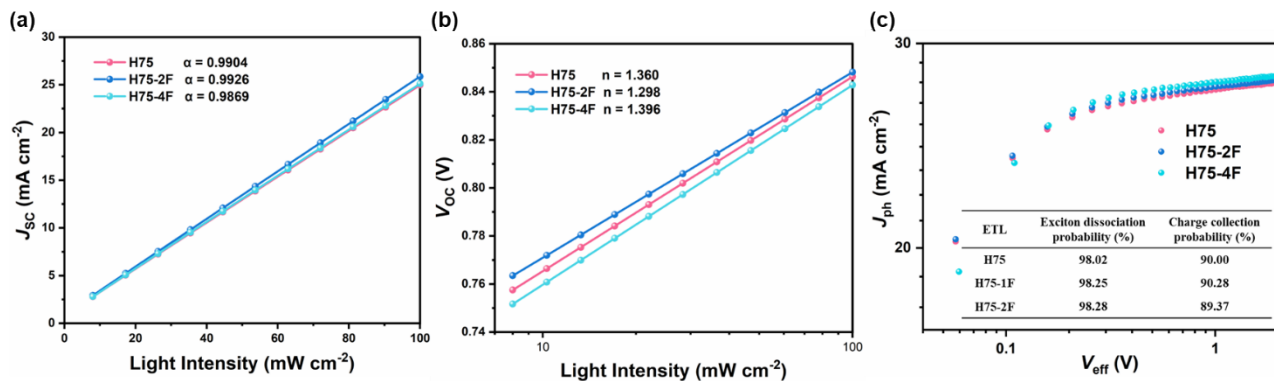

**Fig. S21** (a–b) Light intensity dependence of  $J_{SC}$  and  $V_{OC}$  and c)  $J_{ph}$  versus  $V_{eff}$  plots of the optimized OSCs with H75, H75-2F and H75-4F CIMs based on PM6:BTP-eC9 system.

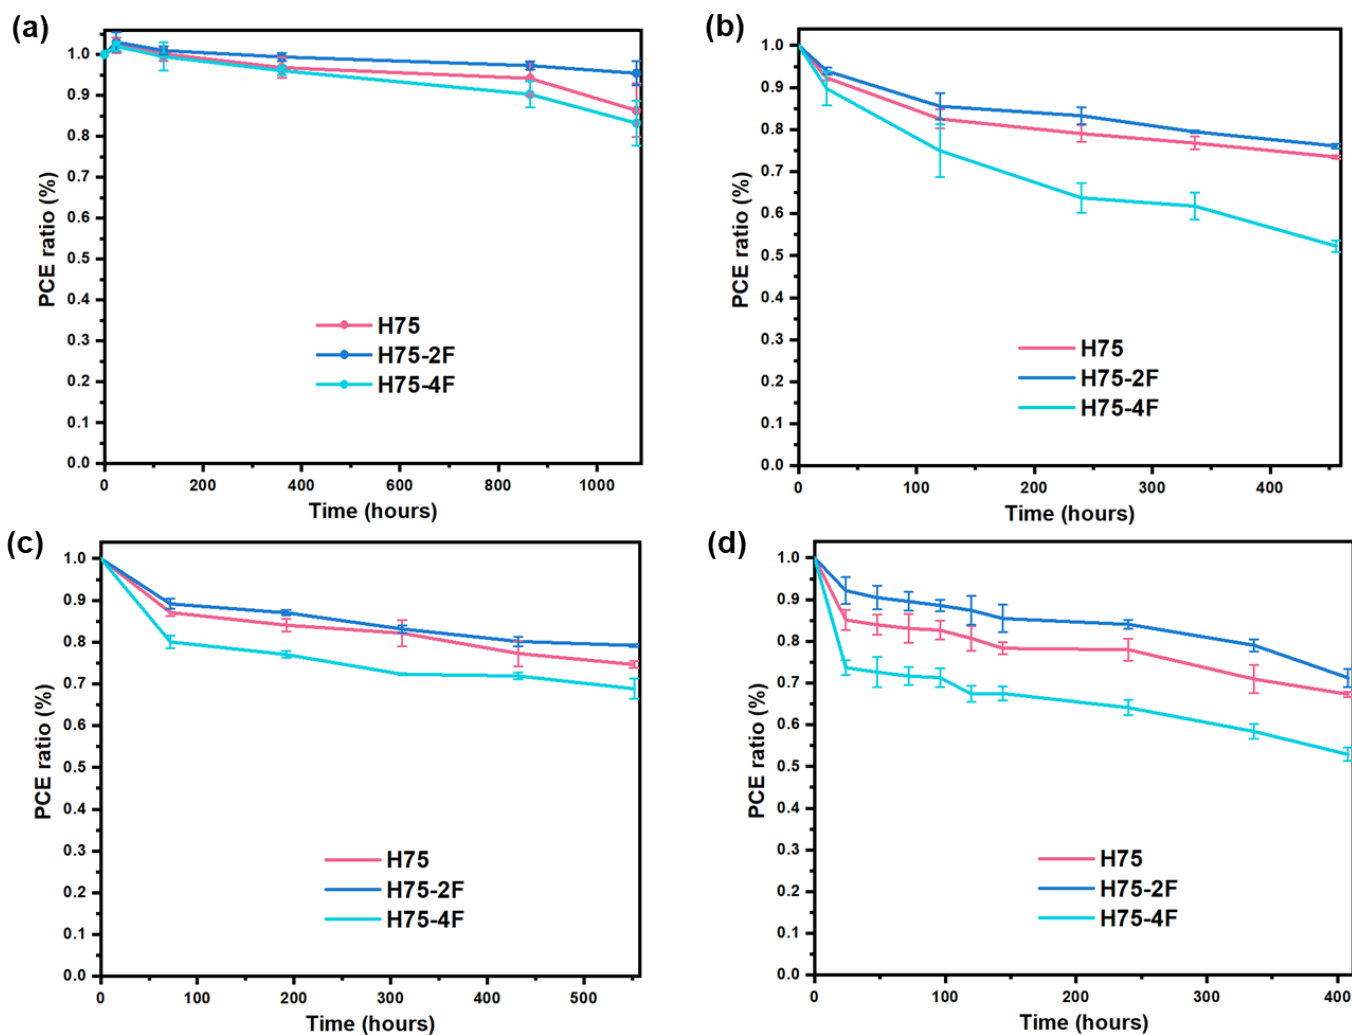

**Fig. S22** Normalized average PCEs of the unencapsulated OSC devices with H75, H75-2F, and H75-4F as a function of time according to the different conditions: under a) glovebox (long-term stability), b) thermal stress at 85 °C (thermal stability), c) Oriel LED solar simulator (light-soaking stability), and d) air ambient environment, 40–60% RH at 25 °C (air stability). The average PCEs and standard variation bars are obtained from 10 individual devices.

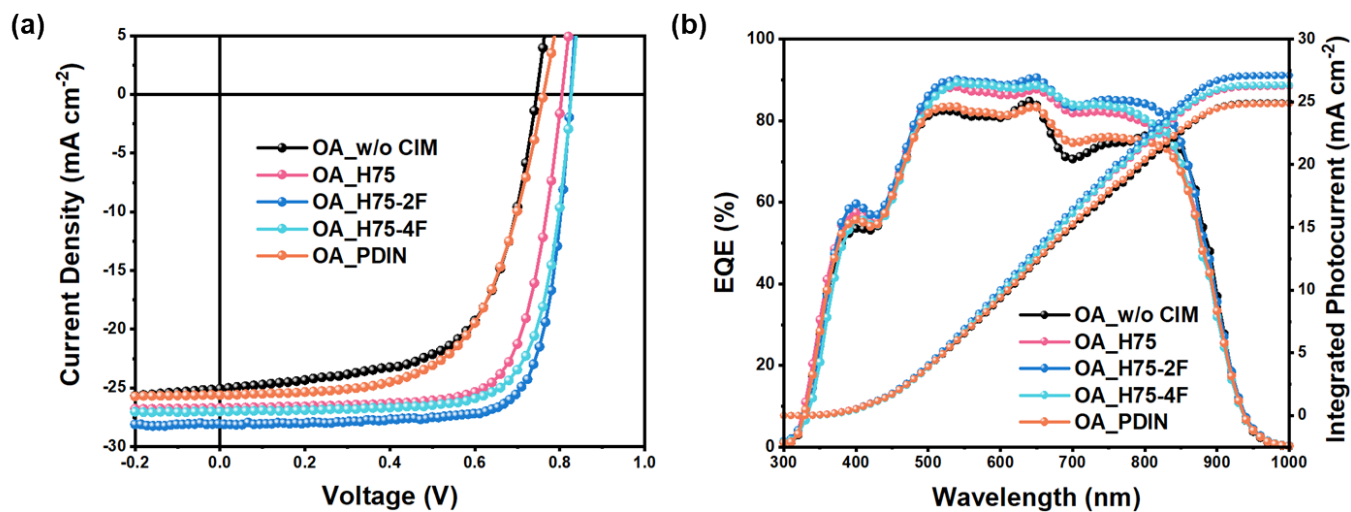

**Fig. S23** (a) The  $J$ - $V$  curves of the OA-processed devices without and with H75, H75-2F, H75-4F, and PDIN CIMs under the illumination of AM 1.5G. (b) The EQE spectra and integrated current densities of the devices.

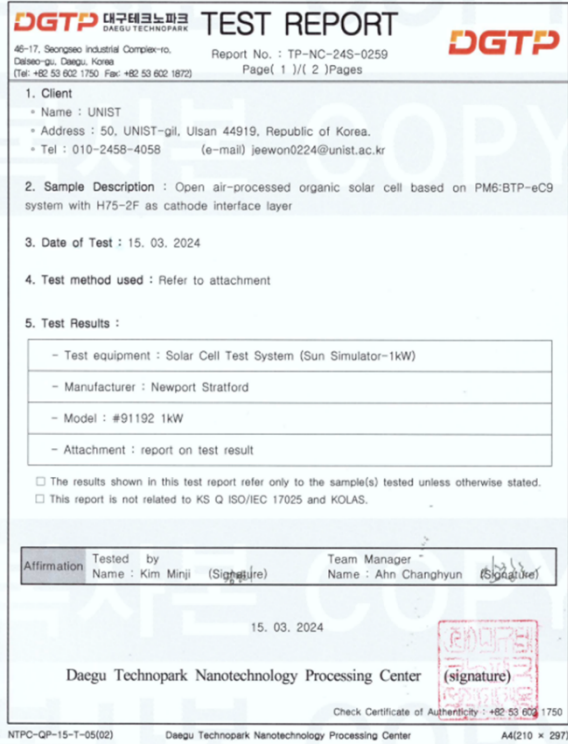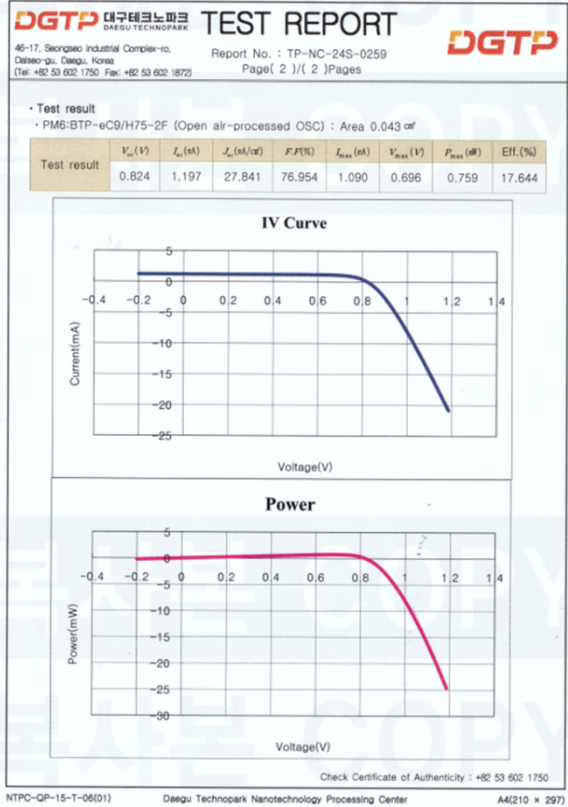

**Fig. S24** Certificate of open air-processed organic solar cell based on PM6:BTP-eC9 system with H75-2F as cathode interface layer from Daegu Technopark Nanotechnology Processing Center (DGTP), Daegu, Korea.

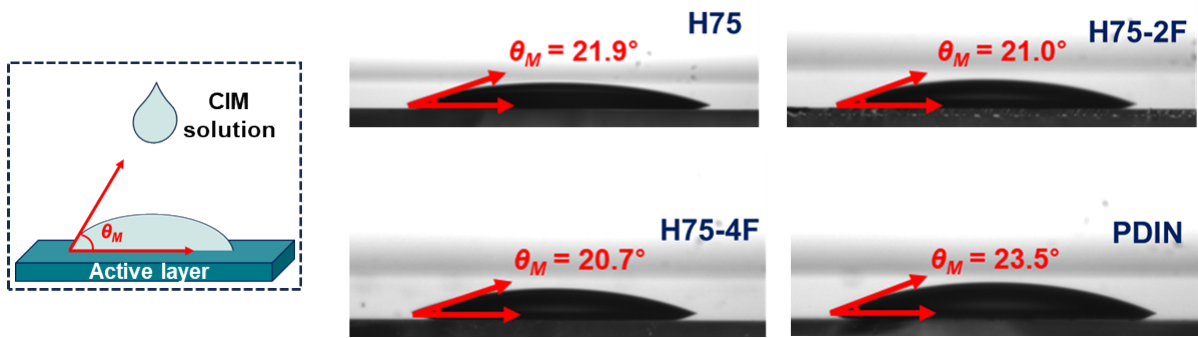

**Fig.**

**S25** Schematic diagram of hydrophobicity measurement among CIM in ethanol solutions on active layer films. The contact angle of H75, H75-2F, H75-4F, and PDIN on PM6: BTP-eC9 active layer film.

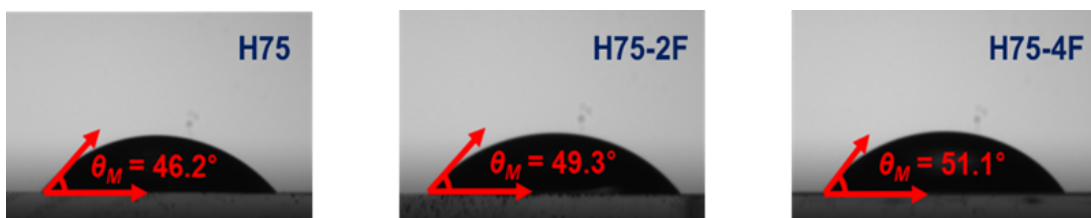

**Fig. S26** The contact angle images of water on H75, H75-2F, and H75-4F CIM surfaces.

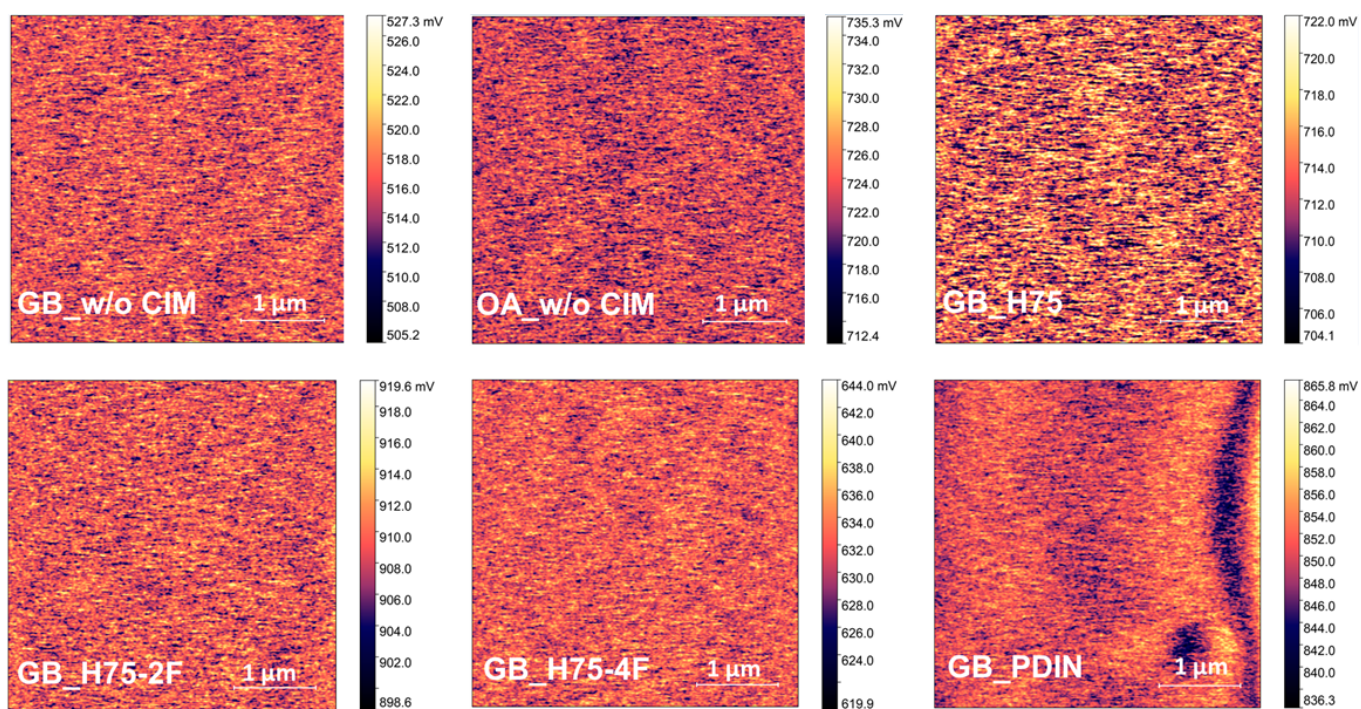

**Fig. S27** The KPFM mapping of without and with H75, H75-2F, H75-4F, and PDIN CIM-deposited active layer films in GB and OA conditions.



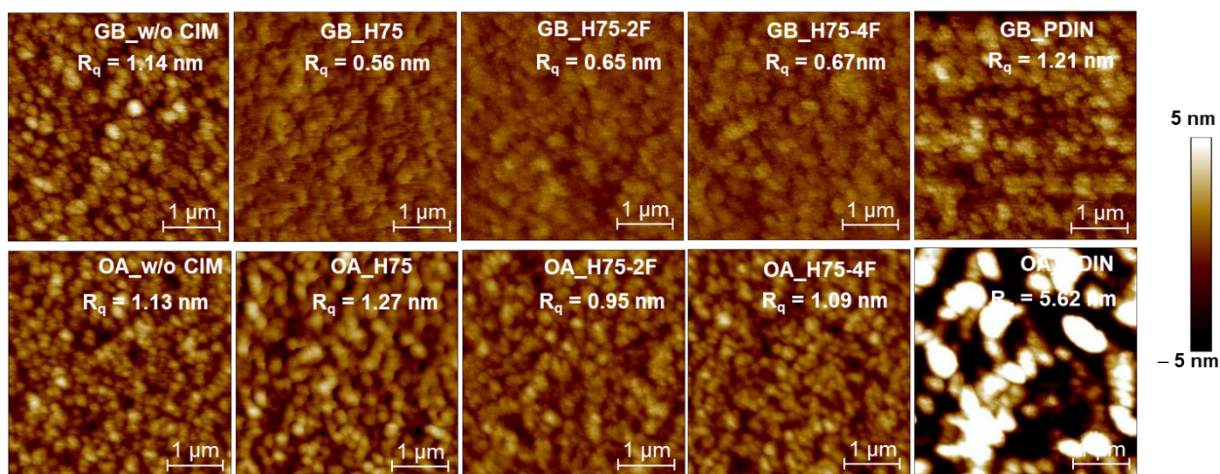

**Fig. S28** AFM height images of active layer films without and with CIMs: H75, H75-2F, H75-4F, and PDIN, deposited under glovebox (GB) and open-air (OA) conditions.

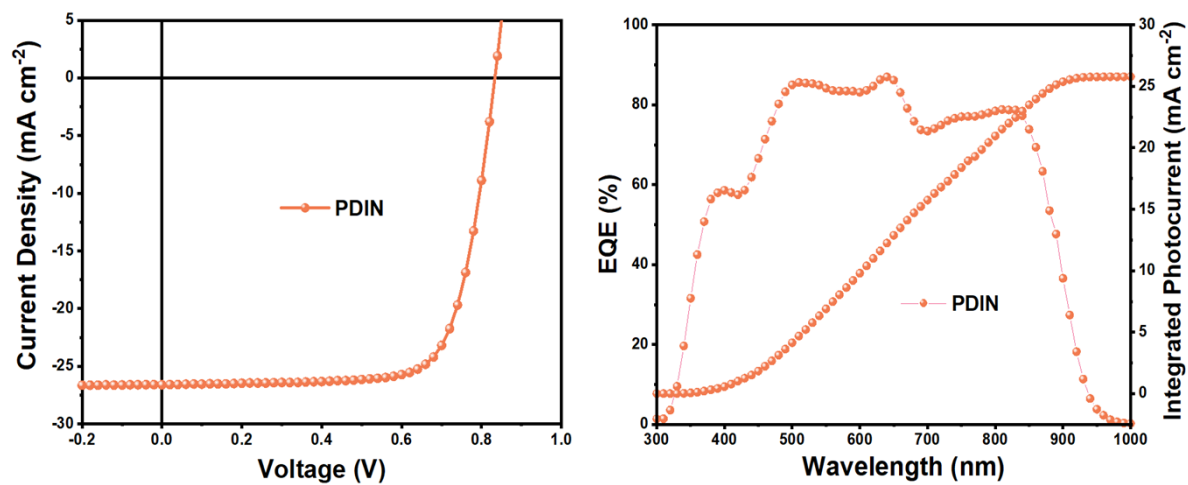

**Fig. S29** The  $J$ - $V$  and EQE curves of the PDIN-based device under GB conditions based on PM6:BTP-eC9 system with PDIN CIM.

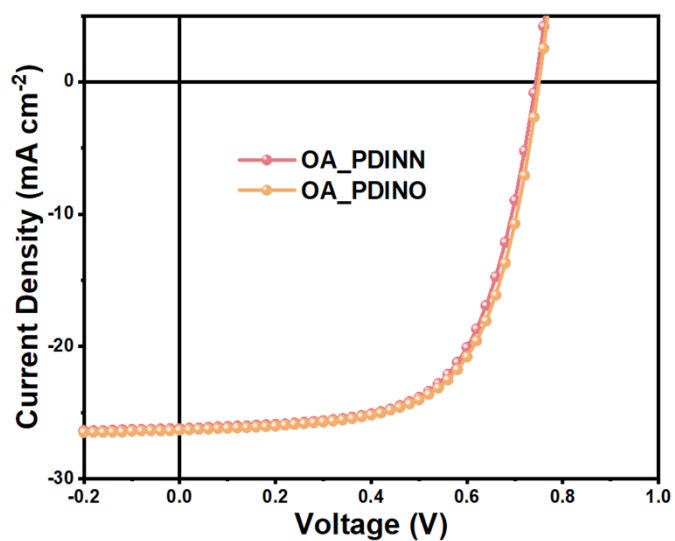

**Fig. S30** The  $J$ - $V$  curves of the OA and XY-processed devices based on PDINN and PDINO CIMs in ethanol solution on PM6:BTP-eC9 system under the illumination of AM 1.5G.

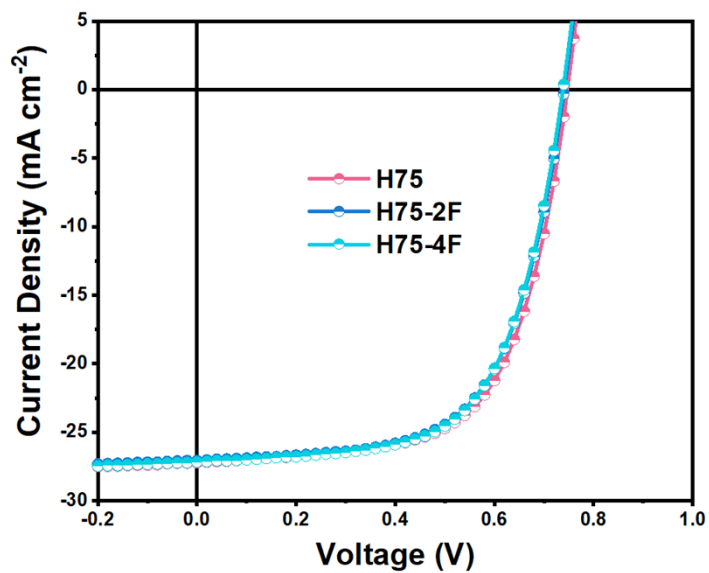

**Fig. S31** The  $J$ - $V$  curves of the OA and XY-processed devices based on H75, H75-2F, and H75-4F CIMs with the addition of acetic acid in ethanol solution on PM6:BTP-eC9 system under the illumination of AM 1.5G.

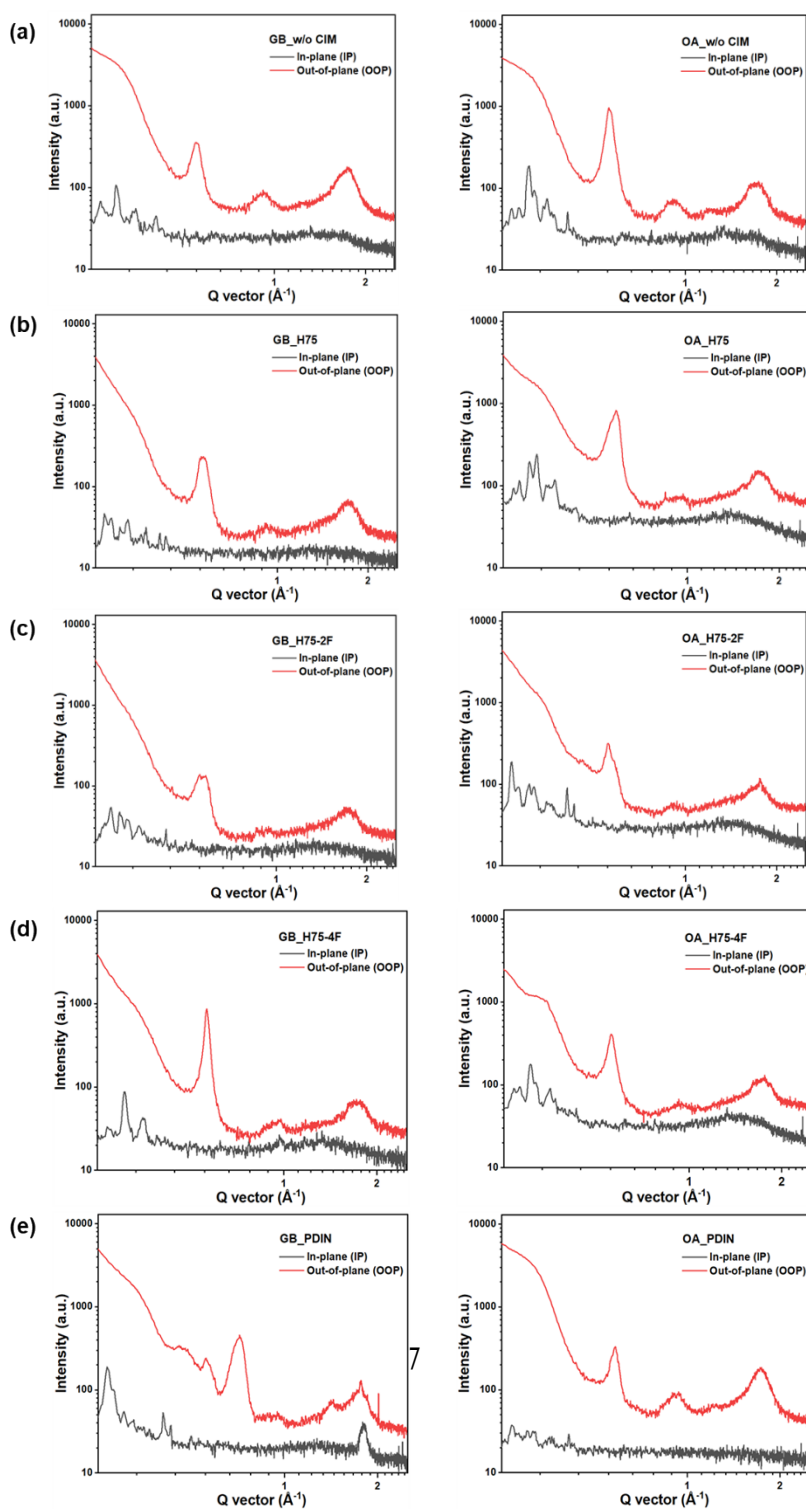

**Fig. S32** 1D GIWAXS line-cut profiles in the IP and OOP directions of (a) the active layer films without CIM, and with CIM deposited: (b) H75, (c) H75-2F, (d) H75-4F, and (e) PDIN, under GB and OA conditions.

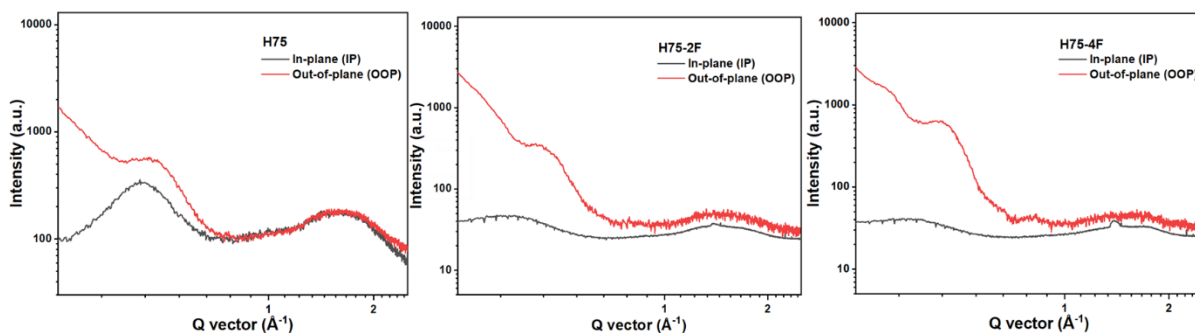

**Fig. S33** 1D GIWAXS line-cut profiles in the IP and OOP directions of H75, H75-2F, and H75-4F neat films.

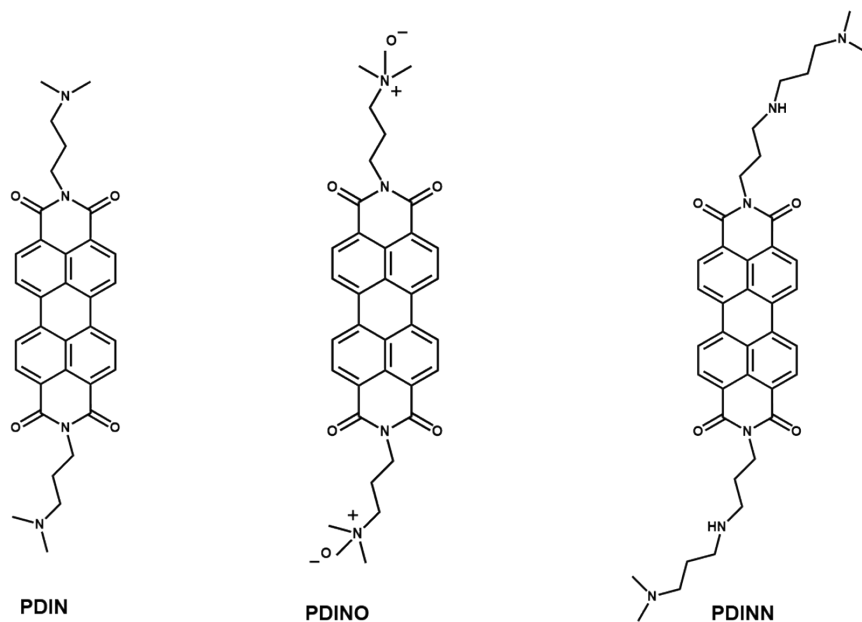

**Fig. S34** The chemical structures of PDIN, PDINO, and PDINN CIMs.

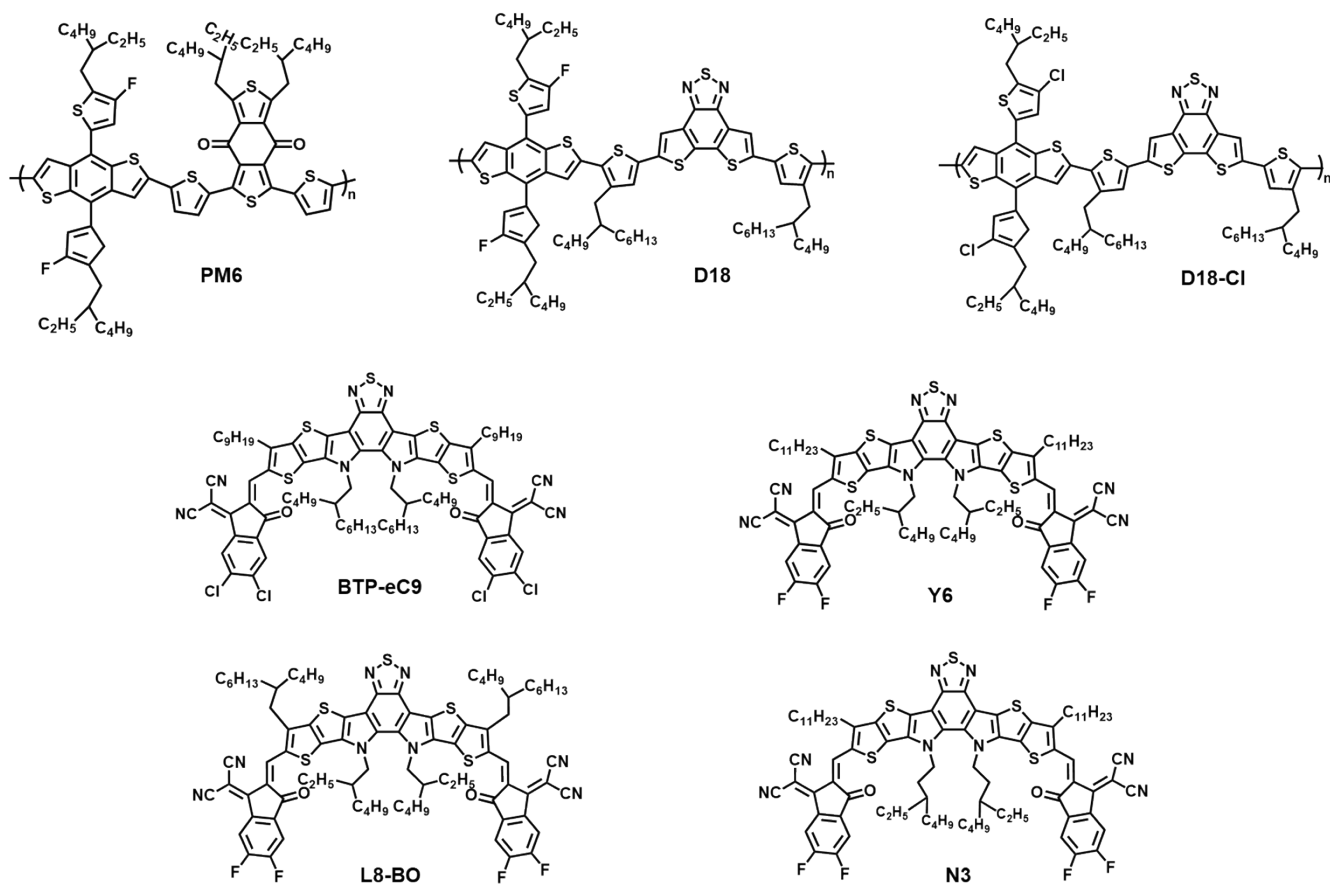

**Fig. S35** Chemical structures of the active layer materials utilized in this work.

**Table S1.** The photovoltaic parameters ratio of devices based on H75, H75-2F, and H75-4F CIMs on PM6:BTP-eC9 under long-term stability in glovebox condition.

| Time  | CIMs   | $V_{oc}^a$<br>(V) | PCE <sup>a</sup><br>(%) | FF <sup>a</sup><br>(%) | $J_{sc}^a$<br>(mA cm <sup>-2</sup> ) |
|-------|--------|-------------------|-------------------------|------------------------|--------------------------------------|
| 24 h  | H75    | 1.00166           | 1.02246                 | 1.00113                | 1.01954                              |
|       | H75-2F | 0.99174           | 1.03012                 | 1.00314                | 1.03622                              |
|       | H75-4F | 0.99968           | 1.02003                 | 1.00091                | 1.01941                              |
| 120 h | H75    | 0.99815           | 1.0015                  | 0.98604                | 1.0176                               |
|       | H75-2F | 0.9993            | 1.00971                 | 0.99533                | 1.01515                              |
|       | H75-4F | 0.99261           | 0.99462                 | 0.99119                | 1.01165                              |
| 360 h | H75    | 0.99392           | 0.96797                 | 0.95986                | 1.01449                              |
|       | H75-2F | 0.99287           | 0.99387                 | 0.97898                | 1.02264                              |
|       | H75-4F | 0.97837           | 0.96046                 | 0.97597                | 1.00589                              |

|        |        |         |         |         |         |
|--------|--------|---------|---------|---------|---------|
| 864 h  | H75    | 0.97521 | 0.9416  | 0.94516 | 1.02136 |
|        | H75-2F | 0.9817  | 0.97283 | 0.98479 | 1.00633 |
|        | H75-4F | 0.97124 | 0.90247 | 0.9241  | 1.00521 |
| 1080 h | H75    | 0.97483 | 0.86333 | 0.88103 | 1.00205 |
|        | H75-2F | 0.96941 | 0.95409 | 0.95695 | 1.02843 |
|        | H75-4F | 0.94715 | 0.83228 | 0.85071 | 1.02997 |

<sup>a</sup> the average PCE values are obtained from at least 10 cells.

**Table S2.** The photovoltaic parameters ratio of devices based on H75, H75-2F, and H75-4F CIMs on PM6:BTP-eC9 under light-soaking stability in glovebox condition.

| Time  | CIMs   | $V_{oc}^a$<br>(V) | $V_{oc}^a$<br>(V) | PCE <sup>a</sup><br>(%) | PCE <sup>a</sup><br>(%) | FF <sup>a</sup><br>(%) | FF <sup>a</sup><br>(%) | $J_{sc}^a$<br>(mA cm <sup>-2</sup> ) | $J_{sc}^a$<br>(mA cm <sup>-2</sup> ) |
|-------|--------|-------------------|-------------------|-------------------------|-------------------------|------------------------|------------------------|--------------------------------------|--------------------------------------|
| 24 h  | H75    | 0.95303           | 0.91182           | 0.87079                 | 0.85095                 | 0.94119                | 0.8953                 | 0.97085                              | 1.04228                              |
|       | H75-2F | 0.95743           | 0.94336           | 0.89148                 | 0.92133                 | 0.94769                | 0.93651                | 0.98248                              | 1.04353                              |
|       | H75-4F | 0.93386           | 0.86973           | 0.80044                 | 0.73659                 | 0.89408                | 0.84216                | 0.95859                              | 1.00557                              |
| 48 h  | H75    | 0.9329            | 0.91325           | 0.84056                 | 0.8396                  | 0.93595                | 0.90541                | 0.96259                              | 1.01526                              |
|       | H75-2F | 0.94767           | 0.94188           | 0.8702                  | 0.90477                 | 0.94521                | 0.94006                | 0.97154                              | 1.02258                              |
|       | H75-4F | 0.92684           | 0.87555           | 0.77012                 | 0.72588                 | 0.86434                | 0.84424                | 0.95964                              | 0.98524                              |
| 72 h  | H75    | 0.94134           | 0.9114            | 0.82131                 | 0.83075                 | 0.89638                | 0.87142                | 0.9706                               | 1.04572                              |
|       | H75-2F | 0.93661           | 0.93661           | 0.89555                 | 0.89555                 | 0.94227                | 0.94227                | 0.9706                               | 1.01577                              |
|       | H75-4F | 0.93327           | 0.93327           | 0.83134                 | 0.83134                 | 0.90743                | 0.90743                | 0.97912                              | 0.97912                              |
| 312 h | H75    | 0.92728           | 0.92728           | 0.77278                 | 0.77278                 | 0.86623                | 0.86623                | 0.96147                              | 0.96147                              |
|       | H75-2F | 0.93367           | 0.93367           | 0.80164                 | 0.80164                 | 0.88248                | 0.88248                | 0.9715                               | 0.9715                               |
|       | H75-4F | 0.92086           | 0.92086           | 0.71895                 | 0.71895                 | 0.8191                 | 0.8191                 | 0.9507                               | 0.9507                               |
| 552 h | H75    | 0.93308           | 0.93308           | 0.74616                 | 0.74616                 | 0.8409                 | 0.8409                 | 0.95125                              | 0.95125                              |
|       | H75-2F | 0.92156           | 0.92156           | 0.79178                 | 0.79178                 | 0.89784                | 0.89784                | 0.95708                              | 0.95708                              |
|       | H75-4F | 0.91208           | 0.91208           | 0.68844                 | 0.68844                 | 0.81619                | 0.81619                | 0.92472                              | 0.92472                              |

<sup>a</sup> the average PCE values are obtained from at least 10 cells.



|       |        |         |         |         |         |
|-------|--------|---------|---------|---------|---------|
|       | H75-4F | 0.87031 | 0.71685 | 0.82052 | 1.00367 |
| 96 h  | H75    | 0.91036 | 0.82676 | 0.89373 | 1.01614 |
|       | H75-2F | 0.94033 | 0.8858  | 0.9106  | 1.03526 |
|       | H75-4F | 0.86651 | 0.71265 | 0.80599 | 1.02039 |
| 120h  | H75    | 0.90946 | 0.80684 | 0.86805 | 1.02197 |
|       | H75-2F | 0.92591 | 0.87392 | 0.91849 | 1.028   |
|       | H75-4F | 0.83854 | 0.67369 | 0.79622 | 1.00897 |
| 144 h | H75    | 0.92511 | 0.78304 | 0.82993 | 1.02018 |
|       | H75-2F | 0.91151 | 0.85474 | 0.9007  | 1.0414  |
|       | H75-4F | 0.85874 | 0.67468 | 0.77885 | 1.00868 |
| 240 h | H75    | 0.90525 | 0.77987 | 0.83406 | 1.03286 |
|       | H75-2F | 0.92722 | 0.84062 | 0.88577 | 1.02377 |
|       | H75-4F | 0.81211 | 0.64104 | 0.77274 | 1.02138 |
| 336 h | H75    | 0.89945 | 0.70961 | 0.77055 | 1.02382 |
|       | H75-2F | 0.90054 | 0.79037 | 0.8457  | 1.03812 |
|       | H75-4F | 0.77625 | 0.58382 | 0.73982 | 1.01662 |
| 408 h | H75    | 0.8696  | 0.67289 | 0.7438  | 1.03782 |
|       | H75-2F | 0.86881 | 0.71235 | 0.78386 | 1.0434  |
|       | H75-4F | 0.72948 | 0.52895 | 0.70548 | 1.02495 |

**Table S3.** The photovoltaic parameters ratio of devices based on H75, H75-2F, and H75-4F CIMs on PM6:BTP-eC9 under air ambient environment stability( 40–60 % RH, 25 °C).

<sup>a</sup> the average PCE values are obtained from at least 10 cells.

**Table S4.** The photovoltaic parameters ratio of devices based on H75, H75-2F, and H75-4F CIMs on PM6:BTP-eC9 under thermal stress stability in glovebox condition.

| Time  | CIMs   | $V_{oc}^a$<br>(V) | PCE <sup>a</sup><br>(%) | FF <sup>a</sup><br>(%) | $J_{sc}^a$<br>(mA cm <sup>-2</sup> ) |
|-------|--------|-------------------|-------------------------|------------------------|--------------------------------------|
| 24 h  | H75    | 0.95089           | 0.92286                 | 0.95727                | 1.01402                              |
|       | H75-2F | 0.9551            | 0.93903                 | 0.97581                | 1.00759                              |
|       | H75-4F | 0.96317           | 0.89702                 | 0.92967                | 1.00172                              |
| 120 h | H75    | 0.92336           | 0.82522                 | 0.89038                | 1.00413                              |
|       | H75-2F | 0.93207           | 0.85518                 | 0.91841                | 0.99868                              |
|       | H75-4F | 0.90105           | 0.74927                 | 0.85056                | 0.97928                              |
| 240 h | H75    | 0.88929           | 0.79022                 | 0.87791                | 1.0109                               |
|       | H75-2F | 0.91625           | 0.83274                 | 0.91057                | 0.99825                              |
|       | H75-4F | 0.84084           | 0.63747                 | 0.76274                | 0.99066                              |
| 336 h | H75    | 0.89763           | 0.76792                 | 0.86248                | 0.99232                              |
|       | H75-2F | 0.90594           | 0.7946                  | 0.88689                | 0.98897                              |
|       | H75-4F | 0.83094           | 0.61772                 | 0.76474                | 0.97159                              |
| 456 h | H75    | 0.8901            | 0.73444                 | 0.82581                | 0.99836                              |
|       | H75-2F | 0.89744           | 0.76065                 | 0.83506                | 1.01302                              |
|       | H75-4F | 0.78684           | 0.52273                 | 0.7008                 | 0.94734                              |

<sup>a</sup> the average PCE values are obtained from at least 10 cells

**Table S5. PCE data of OSCs corresponding to plots in Fig. 3c.**

| Year        | Type of structure | Systems                          | PCE (%) | Ref              |
|-------------|-------------------|----------------------------------|---------|------------------|
| 2017        | Inverted          | PTB7-Th:PDI-DPP-PDI              | 5.6     | 2                |
|             | Conventional      | POD2T-DTBT and PDTBT-alt-TT:PCBM | 5.87    | 3                |
| 2018        | Conventional      | FTAZ:IT-M                        | 9.1     | 4                |
|             |                   |                                  | 9.6     |                  |
|             |                   |                                  | 11.0    |                  |
| 2019        | Conventional      | PTzBI-Si:N2200                   | 11.76   | 5                |
| 2020        | Inverted          | PM6:Y6                           | 15.2    | 6                |
|             |                   |                                  | 15.6    |                  |
|             |                   |                                  | 15.4    |                  |
| 2021        | Inverted          | PM6:Y6                           | 15.93   | 7                |
|             |                   | PTB7-Th:IEICO-4F                 | 11.10   | 8                |
|             |                   | PM6:Y6                           | 15.51   | 9                |
|             |                   | PM6:Y6                           | 15.91   | 10               |
|             |                   | 14.58                            |         |                  |
| 14.75       |                   |                                  |         |                  |
| 2022        | Inverted          | PM6:Y6                           | 15.03   | 11               |
|             |                   |                                  | 14.72   |                  |
|             |                   |                                  | 14.29   |                  |
|             | Conventional      | PM6:Y6                           | 15.10   | 12               |
| PM6:BTP-eC9 | 17.15             |                                  |         |                  |
| 2023        | Inverted          | PM6:Y6-hu                        | 17.38   | 13               |
| 2024        | Conventional      | PM6:BTP-eC9                      | 17.78   | <b>This work</b> |

**Table S6. The photovoltaic parameters of the OA and XY-processed OSCs devices based on PDINN and PDINO as the CIM in ethanol solution on PM6:BTP-eC9 system under the illumination of AM 1.5G, 100 mW cm<sup>-2</sup>**

| <b>CIMs</b> | <b>V<sub>oc</sub><sup>a</sup><br/>(V)</b> | <b>J<sub>sc</sub><sup>a</sup><br/>(mA cm<sup>-2</sup>)</b> | <b>FF<sup>a</sup><br/>(%)</b> | <b>PCE<sup>a</sup><br/>(%)</b> |
|-------------|-------------------------------------------|------------------------------------------------------------|-------------------------------|--------------------------------|
| PDINN       | 0.742<br>(0.740 ± 0.004)                  | 26.44<br>(26.23 ± 0.19)                                    | 63.44<br>(62.69 ± 0.54)       | 12.45<br>(12.17 ± 0.17)        |
| PDINO       | 0.749<br>(0.750 ± 0.0003)                 | 26.58<br>(25.78 ± 0.12)                                    | 63.76<br>(63.72 ± 0.11)       | 12.69<br>(12.32 ± 0.05)        |

<sup>a</sup> the average PCE values are obtained from 5 cells.

**Table S7. The photovoltaic parameters of the OA and XY-processed OSCs devices based on H75, H75-2F, and H75-4F as the CIM with the addition of acetic acid in ethanol solution on PM6:BTP-eC9 system under the illumination of AM 1.5G, 100 mW cm<sup>-2</sup>**

| <b>CIMs</b> | <b>V<sub>oc</sub><sup>a</sup><br/>(V)</b> | <b>J<sub>sc</sub><sup>a</sup><br/>(mA cm<sup>-2</sup>)</b> | <b>FF<sup>a</sup><br/>(%)</b> | <b>PCE<sup>a</sup><br/>(%)</b> |
|-------------|-------------------------------------------|------------------------------------------------------------|-------------------------------|--------------------------------|
| H75         | 0.745<br>(0.742 ± 0.004)                  | 27.21<br>(27.02 ± 0.38)                                    | 63.59<br>(62.56 ± 0.79)       | 12.90<br>(12.56 ± 0.38)        |
| H75-2F      | 0.739<br>(0.739 ± 0.001)                  | 27.56<br>(27.23 ± 0.26)                                    | 62.83<br>(62.35 ± 0.42)       | 12.82<br>(12.55 ± 0.16)        |
| H75-4F      | 0.737<br>(0.734 ± 0.003)                  | 27.17<br>(27.23 ± 0.50)                                    | 62.99<br>(61.14 ± 0.98)       | 12.61<br>(12.22 ± 0.31)        |

<sup>a</sup> the average PCE values are obtained from 5 cells.

## 7. Reference

- 1 T. L. H. Mai, S. Jeong, S. Kim, S. Jung, J. Oh, Z. Sun, J. Park, S. Lee, W. Kim and C. Yang, *Adv. Funct. Mater.*, 2023, **33**, 2303386.
- 2 S. M. McAfee, S. V. Dayneko, P. Josse, P. Blanchard, C. Cabanetos and G. C. Welch, *Chem. Mat.*, 2017, **29**, 1309-1314.
- 3 S.-L. Lim, K.-H. Ong, J. Li, L. Yang, Y.-F. Chang, H.-F. Meng, X. Wang and Z.-K. Chen, *Org. Electron.*, 2017, **43**, 55-63.
- 4 L. Ye, Y. Xiong, Q. Zhang, S. Li, C. Wang, Z. Jiang, J. Hou, W. You and H. Ade, *Adv. Mater.*, 2018, **30**, 1705485.
- 5 L. Zhu, W. Zhong, C. Qiu, B. Lyu, Z. Zhou, M. Zhang, J. Song, J. Xu, J. Wang, J. Ali, W. Feng, Z. Shi, X. Gu, L. Ying, Y. Zhang and F. Liu, *Adv. Mater.*, 2019, **31**, 1902899.
- 6 H. Zhao, H. B. Naveed, B. Lin, X. Zhou, J. Yuan, K. Zhou, H. Wu, R. Guo, M. A. Scheel, A. Chumakov, S. V. Roth, Z. Tang, P. Müller-Buschbaum and W. Ma, *Adv. Mater.*, 2020, **32**, 2002302.
- 7 J. Yuan, D. Liu, H. Zhao, B. Lin, X. Zhou, H. B. Naveed, C. Zhao, K. Zhou, Z. Tang, F. Chen and W. Ma, *Adv. Energy Mater.*, 2021, **11**, 2100098.
- 8 N. Chaturvedi, N. Gasparini, D. Corzo, J. Bertrandie, N. Wehbe, J. Troughton and D. Baran, *Adv. Funct. Mater.*, 2021, **31**, 2009996.
- 9 Y. Li, H. Liu, J. Wu, H. Tang, H. Wang, Q. Yang, Y. Fu and Z. Xie, *ACS Appl. Mater. Interfaces*, 2021, **13**, 10239-10248.
- 10 R. Ma, T. Yang, Y. Xiao, T. Liu, G. Zhang, Z. Luo, G. Li, X. Lu, H. Yan and B. Tang, *Energy Environ. Mater.*, 2022, **5**, 977-985.
- 11 J. Xue, H. B. Naveed, H. Zhao, B. Lin, Y. Wang, Q. Zhu, B. Wu, Z. Bi, X. Zhou, C. Zhao, K. Zhou and W. Ma, *J. Mater. Chem. A*, 2022, **10**, 13439-13447.
- 12 H. Li, S. Liu, X. Wu, Q. Qi, H. Zhang, X. Meng, X. Hu, L. Ye and Y. Chen, *Energy Environ. Sci.*, 2022, **15**, 2130-2138.
- 13 S. Rasool, J. W. Kim, H. W. Cho, Y.-J. Kim, D. C. Lee, C. B. Park, W. Lee, O.-H. Kwon, S. Cho and J. Y. Kim, *Adv. Energy Mater.*, 2023, **13**, 2203452.
